# Supplementary material for: Opioid-sparing effect of cannabinoids for analgesia: an updated systematic review and meta-analysis of preclinical and clinical studies
Source: PubMed Central journal article supplement (PMC9117273; doi:10.1038/s41386-022-01322-4), 2022-04-22
Supplement: 41386_2022_1322_MOESM1_ESM.pdf [file 41386_2022_1322_MOESM1_ESM.pdf]

## Online Appendices: Opioid-sparing Effect of Cannabinoids: A Systematic Review and Meta-analysis

Suzanne Nielsen, Louisa Picco, Bridin Murnion, Bryony Winters, Justin Matheson, Myfanwy Graham, Gabrielle Campbell, Laila Parvaresh, Kok-Eng Khor, Brigid Betz-Stablein, Michael Farrell, Nicholas Lintzeris, Bernard Le Foll

Corresponding author : [Suzanne.nielsen@monash.edu](mailto:Suzanne.nielsen@monash.edu)

Please contact to request any materials used in the review. Data extracted from included studies are contained in Tables 2, Figure 1 & 2 and Appendix 4.

|                                                                                                                       |    |
|-----------------------------------------------------------------------------------------------------------------------|----|
| Appendix 1: Embase search terms.....                                                                                  | 2  |
| Appendix 2. Excluded Studies with reasons for exclusion.....                                                          | 3  |
| Appendix 3. PRISMA diagram showing study identification.....                                                          | 7  |
| Appendix 4. Preclinical studies .....                                                                                 | 8  |
| Appendix 5. Proportion of participants in observational studies reporting cessation and reduction in opioid use ..... | 16 |
| Appendix 6: Registered clinical trials, where results are not yet available .....                                     | 17 |

## Appendix 1: Embase search terms

|     |                                                           |
|-----|-----------------------------------------------------------|
| 1.  | exp opiate/                                               |
| 2.  | analgesic agent/                                          |
| 3.  | (opioid* or opiate* or opium).tw.                         |
| 4.  | 1 or 2 or 3                                               |
| 5.  | cannabinoid/                                              |
| 6.  | cannabinoid*.tw.                                          |
| 7.  | Cannabis/                                                 |
| 8.  | Cannabis.tw.                                              |
| 9.  | sativex.tw.                                               |
| 10. | nabiximols/                                               |
| 11. | nabiximol*.tw.                                            |
| 12. | cannabinol/                                               |
| 13. | cannabinol.tw.                                            |
| 14. | tetrahydrocannabinol/                                     |
| 15. | tetrahydrocannabinol.tw.                                  |
| 16. | 5 or 6 or 7 or 8 or 9 or 10 or 11 or 12 or 13 or 14 or 15 |
| 17. | exp Pain/                                                 |
| 18. | pain.tw.                                                  |
| 19. | opioid sparing.tw.                                        |
| 20. | opioid dose.tw.                                           |
| 21. | antinociceptive agent/                                    |
| 22. | antinociceptive.tw.                                       |
| 23. | 17 or 18 or 19 or 20 or 21 or 22                          |
| 24. | 4 and 16 and 23                                           |
| 25. | limit 24 to yr="2015 -Current"                            |

## Appendix 2. Excluded Studies with reasons for exclusion

| Author, year                                                                                                                                                                                                            | Title                                                                                                                                                                                                              | Reason for exclusion                   |
|-------------------------------------------------------------------------------------------------------------------------------------------------------------------------------------------------------------------------|--------------------------------------------------------------------------------------------------------------------------------------------------------------------------------------------------------------------|----------------------------------------|
| Abraham, A. D.; Leung, E. J. Y.; Wong, B. A.; Rivera, Z. M. G.; Kruse, L. C.; Clark, J. J.; Land, B. B. (2020)                                                                                                          | Orally consumed cannabinoids provide long-lasting relief of allodynia in a mouse model of chronic neuropathic pain                                                                                                 | Wrong intervention                     |
| Aleissa, M. M.; Ahern, K. L.; Stern, G. M. (2020)                                                                                                                                                                       | Peri-operative opioid and sedation requirements in patients who use marijuana and are undergoing total knee or total hip arthroplasty: A retrospective study                                                       | Wrong study design                     |
| Arboleda, M. F.; Dam, V.; Prosk, E.; Dworkind, M.; Vigano, A. (2018)                                                                                                                                                    | Cannabis-Based Medications: The Future Co-analgesics of Choice for Cancer Patients?                                                                                                                                | Unable to confirm details with author  |
| Balash, Y.; Bar-Lev Schleider, L.; Korczyn, A. D.; Shabtai, H.; Knaani, J.; Rosenberg, A.; Baruch, Y.; Djaldetti, R.; Giladi, N.; Gurevich, T. (2017)                                                                   | Medical Cannabis in Parkinson Disease: Real-Life Patients' Experience                                                                                                                                              | Wrong study design                     |
| Barlowe, T. S.; Koliiani-Pace, J. L.; Smith, K. D.; Gordon, S. R.; Gardner, T. B. (2019)                                                                                                                                | Effects of Medical Cannabis on Use of Opioids and Hospital Visits by Patients With Painful Chronic Pancreatitis                                                                                                    | No cannabis dose reported              |
| Bauer, F. L.; Donahoo, W. T.; Hollis, H. W.; Tsai, A. G.; Pottorf, B. J.; Johnson, J. M.; Silveira, L. J.; Husain, F. A. (2018)                                                                                         | Marijuana's Influence on Pain Scores, Initial Weight Loss, and Other Bariatric Surgical Outcomes                                                                                                                   | Wrong study design                     |
| Bekker, A. (2018)                                                                                                                                                                                                       | Cannabis use and non-cancer chronic pain                                                                                                                                                                           | Wrong study design                     |
| Bhashyam, A. R.; Heng, M.; Harris, M. B.; Vrahas, M. S.; Weaver, M. J. (2018)                                                                                                                                           | Self-Reported Marijuana Use Is Associated with Increased Use of Prescription Opioids Following Traumatic Musculoskeletal Injury                                                                                    | Wrong study design                     |
| Bisaga, A.; Sullivan, M. A.; Glass, A.; Mishlen, K.; Pavlicova, M.; Haney, M.; Raby, W. N.; Levin, F. R.; Carpenter, K. M.; Mariani, J. J.; Nunes, E. V. (2015)                                                         | The effects of dronabinol during detoxification and the initiation of treatment with extended release naltrexone                                                                                                   | Wrong study design                     |
| Boehnke, K. F.; Litinas, E.; Clauw, D. J. (2016)                                                                                                                                                                        | Medical Cannabis Use Is Associated with Decreased Opiate Medication Use in a Retrospective Cross-Sectional Survey of Patients with Chronic Pain                                                                    | Wrong study design                     |
| Boehnke, K. F.; Scott, J. R.; Litinas, E.; Sisley, S.; Williams, D. A.; Clauw, D. J. (2019)                                                                                                                             | Pills to Pot: Observational Analyses of Cannabis Substitution Among Medical Cannabis Users With Chronic Pain                                                                                                       | Wrong study design                     |
| Bulbul, A.; Mino, E. A.; Khorsand-Sahbaie, M.; Lentkowski, L. (2018)                                                                                                                                                    | Opioid dose reduction and pain control with medical cannabis                                                                                                                                                       | Unable to confirm details with authors |
| Chelliah, M. P.; Zinn, Z.; Khuu, P.; Teng, J. M. C. (2018)                                                                                                                                                              | Self-initiated use of topical cannabidiol oil for epidermolysis bullosa                                                                                                                                            | Wrong study design                     |
| Chopda, G. R.; Parge, V.; Thakur, G. A.; Gatley, S. J.; Makriyannis, A.; Paronis, C. A. (2016)                                                                                                                          | Tolerance to the diuretic effects of cannabinoids and cross-tolerance to a kappa-opioid agonist in THC-treated mice                                                                                                | Wrong intervention                     |
| Cocchiara, E.; Spinella, A.; Magnani, L.; Lumetti, F.; Palermo, A.; Baiocchi, G.; Salvarani, C.; Giuggioli, D. (2019)                                                                                                   | Cannabinoids in the treatment of pain related to systemic sclerosis skin ulcers: Our experience                                                                                                                    | Unable to confirm details with authors |
| Cooper, Z. D.; Comer, S. D.; Haney, M. (2017)                                                                                                                                                                           | Opioid modulation of cannabis-induced analgesia and subjective effects in cannabis smokers                                                                                                                         | Abstract where full paper published    |
| Cudmore, J.; Daeninck, P. J. (2015)                                                                                                                                                                                     | Use of medical cannabis to reduce pain and improve quality of life in cancer patients                                                                                                                              | Full text unavailable                  |
| Cuñetti, L.; Manzo, L.; Peyraube, R.; Arnaiz, J.; Curi, L.; Orihuela, S. (2018)                                                                                                                                         | Chronic Pain Treatment With Cannabidiol in Kidney Transplant Patients in Uruguay                                                                                                                                   | No outcome measure of interest         |
| Curtis, S. A.; Lew, D.; Spodick, J.; Hendrickson, J. E.; Minniti, C. P.; Roberts, J. D. (2020)                                                                                                                          | Medical marijuana certification for patients with sickle cell disease: A report of a single center experience                                                                                                      | Wrong study design                     |
| Darnall, B. D.; Humphreys, K. N. (2018)                                                                                                                                                                                 | An experimental method for assessing whether marijuana use reduces opioid use in patients with chronic pain                                                                                                        | Wrong study design                     |
| Datta, U.; Kelley, L. K.; Middleton, J. W.; Gilpin, N. W. (2020)                                                                                                                                                        | Positive allosteric modulation of the cannabinoid type-1 receptor (CB1R) in periaqueductal gray (PAG) antagonizes anti-nociceptive and cellular effects of a mu-opioid receptor agonist in morphine-withdrawn rats | Wrong intervention                     |
| Davies, E.; Boge, J.; Salas, M.                                                                                                                                                                                         | Dronabinol for the treatment of veterans with chronic pain: A retrospective case series                                                                                                                            | Unable to confirm details with authors |
| de Almeida, A. S.; Rigo, F. K.; De Pra, S. D. T.; Milioli, A. M.; Dalenogare, D. P.; Pereira, G. C.; Ritter, C. S.; Peres, D. S.; Antoniazzi, C. T. D.; Stein, C.; Moresco, R. N.; Oliveira, S. M.; Trevisan, G. (2019) | Characterization of Cancer-Induced Nociception in a Murine Model of Breast Carcinoma                                                                                                                               | Wrong intervention                     |
| De Aquino, J. P.; Sofuoglu, M.; Stefanovics, E. A.; Rosenheck, R. A. (2020)                                                                                                                                             | Impact of cannabis on non-medical opioid use and symptoms of posttraumatic stress disorder: a nationwide longitudinal VA study                                                                                     | Wrong study design                     |
| Ding, H.; Kiguchi, N.; Kishioka, S.; Ko, M. C. (2016)                                                                                                                                                                   | Comparison of heroin- and delta- <sup>9</sup> -tetrahydrocannabinol-induced antinociception and physical dependence in monkeys                                                                                     | Full text unavailable                  |
| Dusi, V.; Attili, S. V. S.; Singaraju, M. (2019)                                                                                                                                                                        | Observational study on role of crude cannabis in pain control and quality of life in terminally ill cancer patients: An Indian perspective                                                                         | Unable to confirm details with authors |
| Dvoracko, S.; Keresztes, A.; Mollica, A.; Stefanucci, A.; Macedonio, G.; Pieretti, S.; Zador, F.; Walter, F. R.; Deli, M. A.; Kekesi, G.; Banki, L.; Tuboly, G.; Horvath, G.; Tomboly, C. (2019)                        | Preparation of bivalent agonists for targeting the mu opioid and cannabinoid receptors                                                                                                                             | Wrong intervention                     |
| Gallo, E.; Maggini, V.; Comite, M.; Sofi, F.; Baccetti, S.; Vannacci, A.; Di Stefano, M.; Monechi, M. V.; Gori, L.; Rossi, E.; Firenzuoli, F.; Mediati, R. D.; Ballerini, G.                                            | SENeCA Study: Observational study on the effect of medicinal cannabis on quality of life and nutritional outcomes                                                                                                  | Full text unavailable                  |
| Gerak, L. R.; France, C. P. (2016)                                                                                                                                                                                      | Combined treatment with morphine and DELTA- <sup>9</sup> -tetrahydrocannabinol in rhesus monkeys: Antinociceptive tolerance and withdrawal                                                                         | No outcome measure of interest         |

|                                                                                                                                                                                                    |                                                                                                                                                                                               |                                        |
|----------------------------------------------------------------------------------------------------------------------------------------------------------------------------------------------------|-----------------------------------------------------------------------------------------------------------------------------------------------------------------------------------------------|----------------------------------------|
| Gerak, L. R.; Zanettini, C.; Koek, W.; France, C. P. (2015)                                                                                                                                        | Cross-tolerance to cannabinoids in morphine-tolerant rhesus monkeys                                                                                                                           | Wrong intervention                     |
| Gilpin, N. W.; Datta, U.; Avegno, E. M.; Lobell, T. D.; Itoga, C. A.; Weera, M. M.; Edwards, S.; Middleton, J. W. (2019)                                                                           | Periaqueductal gray (PAG) plasticity in hyperalgesic rats dependent on alcohol or morphine                                                                                                    | Unable to confirm details with authors |
| Giorgi, V.; Bongiovanni, S.; Atzeni, F.; Marotto, D.; Salaffi, F.; Sarzi-Puttini, P. (2020)                                                                                                        | Adding medical cannabis to standard analgesic treatment for fibromyalgia: a prospective observational study                                                                                   | Unable to confirm details with authors |
| Giorno, T. B. S.; Moreira, I. G.; Rezende, C. D. M.; Fernandes, P. D. (2018)                                                                                                                       | A new N-alkanoyl-5-hydroxytryptamide produces central antinociception and ameliorates thermal hyperalgesia                                                                                    | Unable to confirm details with authors |
| Godoi, M. M.; Junior, H. Z.; da Cunha, J. M.; Zanolini, J. M. (2020)                                                                                                                               | Mu-opioid and CB1 cannabinoid receptors of the dorsal periaqueductal gray interplay in the regulation of fear response, but not antinociception                                               | Wrong intervention                     |
| Gonzalez-Rodriguez, S.; Poras, H.; Menendez, L.; Lastra, A.; Ouimet, T.; Fournie-Zaluski, M. C.; Roques, B. P.; Baamonde, A. (2017)                                                                | Synergistic combinations of the dual enkephalinase inhibitor PL265 given orally with various analgesic compounds acting on different targets, in a murine model of cancer-induced bone pain   | Wrong intervention                     |
| Grenald, S.; Guan, Y.; Raja, S. (2018)                                                                                                                                                             | Peripheral cannabinoid and mu opioid receptor synergistic inhibition of neuropathic pain                                                                                                      | Unable to confirm details with authors |
| Grenald, S.; Wang, Y.; Young, M.; Stark, J.; Hu, J.; Vanderah, T. (2015)                                                                                                                           | Synergistic drug interaction between morphine and a cannabinoid receptor 2 agonist in a model of neuropathic pain                                                                             | Unable to confirm details with authors |
| Harris, H. M.; Rousseau, M. A.; Wanas, A. S.; Radwan, M. M.; Caldwell, S.; Sufka, K. J.; Elsohly, M. A. (2019)                                                                                     | Role of Cannabinoids and Terpenes in Cannabis-Mediated Analgesia in Rats                                                                                                                      | Wrong intervention                     |
| Hauser, W.; Welsch, P.; Klose, P.; Radbruch, L.; Fitzcharles, M. A. (2019)                                                                                                                         | Efficacy, tolerability and safety of cannabis-based medicines for cancer pain: A systematic review with meta-analysis of randomised controlled trials                                         | Wrong study design                     |
| Hicks, K.; Snyder, C. (2018)                                                                                                                                                                       | Impact of high-dose cannabis use in patients with advanced pancreatic cancer undergoing treatment in a phase I clinical trial: Lessons learned and impact on future clinical research design  | Unable to confirm details with authors |
| Higgins, P.; Ginsburg, D.; Gilder, K.; Walsh, B.; English, B.; Turner, S.; Klassen, P.; Hanauer, S.; Barish, C.; Yacyshyn, B. (2019)                                                               | Safety and efficacy of olorinab, a peripherally restricted, highly-selective, cannabinoid receptor 2 agonist in a phase 2A study in chronic abdominal pain associated with Crohn's disease    | Wrong intervention                     |
| Huang, I. C.; Buckley, M.; Zhenghong, L.; Ehrhardt, M.; Alberts, N.; Brinkman, T.; Allen, J.; Krull, K.; Klosky, J.; Greene, W.; Srivastava, D. K.; Robison, L.; Hudson, M.; Anghelescu, D. (2018) | Persistent bodily pain and use of opioids and marijuana: A longitudinal study among adult survivors of childhood cancer in the St. Jude lifetime cohort (SJLIFE)                              | Wrong study design                     |
| Hutchison, K. E.; Hagerty, S. L.; Galinkin, J.; Bryan, A. D.; Bidwell, L. C. (2019)                                                                                                                | Cannabinoids, Pain, and Opioid Use Reduction: The Importance of Distilling and Disseminating Existing Data                                                                                    | Wrong study design                     |
| Ishida, J. H.; Wong, P. O.; Cohen, B. E.; Vali, M.; Steigerwald, S.; Keyhani, S. (2019)                                                                                                            | Substitution of marijuana for opioids in a national survey of US adults                                                                                                                       | Wrong study design                     |
| Iyer, V.; Slivicki, R. A.; Thomaz, A. C.; Crystal, J. D.; Mackie, K.; Hohmann, A. G. (2020)                                                                                                        | The cannabinoid CB <sub>2</sub> receptor agonist LY2828360 synergizes with morphine to suppress neuropathic nociception and attenuates morphine reward and physical dependence                | Duplicate                              |
| Jamal, N.; Korman, J.; Musing, M.; Malavade, A.; Coleman, B. L.; Siddiqui, N.; Friedman, Z. (2019)                                                                                                 | Effects of pre-operative recreational smoked cannabis use on opioid consumption following inflammatory bowel disease surgery: A historical cohort study                                       | Wrong study design                     |
| Jarmuz, A.; Zielinska, M.; Keasling, A.; Zjawiony, J.; Fichna, J. (2016)                                                                                                                           | Interactions between the endogenous opioid and cannabinoid systems in the gastrointestinal tract are crucial in the development of tolerance to opioids                                       | Abstract where full paper published    |
| Javid, H.; Rezayof, A.; Ghasemzadeh, Z.; Sardari, M. (2020)                                                                                                                                        | The involvement of ventral hippocampal microglial cells, but not cannabinoid CB1 receptors, in morphine-induced analgesia in rats                                                             | Wrong study design                     |
| Jemos, C.; Villa, J.; Zuniga Guerrero, A. M.; Guardamagna, V. A.; Omodeo Sale, E. (2018)                                                                                                           | The use of cannabis oil in oncological pain: Analysis of the outcomes in real practice at a cancer centre                                                                                     | Unable to confirm details with authors |
| Jennings, J. M.; Angerame, M. R.; Eschen, C. L.; Phocas, A. J.; Dennis, D. A. (2019)                                                                                                               | Cannabis Use Does Not Affect Outcomes After Total Knee Arthroplasty                                                                                                                           | Wrong study design                     |
| Jicha, C. J.; Lofwall, M. R.; Nuzzo, P. A.; Babalonis, S.; Elayi, S. C.; Walsh, S. L. (2015)                                                                                                       | Safety of oral dronabinol during opioid withdrawal in humans                                                                                                                                  | No outcome measure of interest         |
| Kandasamy, R.; Dawson, C. T.; Hilgendorf, T. N.; Morgan, M. M. (2018)                                                                                                                              | Medication overuse headache following repeated morphine, but not [INCREMENT]9-tetrahydrocannabinol administration in the female rat                                                           | Wrong intervention                     |
| Koliani-Pace, J.; Gordon, S. R.; Gardner, T. B. (2017)                                                                                                                                             | The effect of medical cannabis on pain and opioid use in chronic pancreatitis                                                                                                                 | Abstract where full paper published    |
| Kreutzkamp, B.; Häuser, W. (2018)                                                                                                                                                                  | Chronic pain: Only few patients on opioids benefit from additional (illegal) cannabis                                                                                                         | Wrong study design                     |
| Levin, D. N.; Dulberg, Z.; Chan, A.; Hare, G.; Mazer, C.; Hong, A. (2016)                                                                                                                          | A randomized controlled trial of nabilone for the prevention of postoperative nausea and vomiting in elective surgery                                                                         | Abstract where full paper published    |
| Li, A. L.; Lin, X.; Dhopeswarkar, A. S.; Thomaz, A. C.; Carey, L. M.; Liu, Y.; Nikas, S. P.; Makriyannis, A.; Mackie, K.; Hohmann, A. G. (2019)                                                    | Cannabinoid CB2 agonist AM1710 differentially suppresses distinct pathological pain states and attenuates morphine tolerance and withdrawal                                                   | Wrong intervention                     |
| Limbach, K. E.; Pommier, S. J.; Pommier, R. F.; Naik, A. M. (2019)                                                                                                                                 | A prospective study of opioid use for postoperative pain management after breast surgery                                                                                                      | Wrong study design                     |
| Lin, X.; Dhopeswarkar, A. S.; Huibregtse, M.; MacKie, K.; Hohmann, A. G. (2018)                                                                                                                    | Slowly signaling G protein-biased CB <sub>2</sub> cannabinoid receptor agonist LY2828360 suppresses neuropathic pain with sustained efficacy and attenuates morphine tolerance and dependence | No outcome measure of interest         |
| Lo Castro, F.; Baraldi, C.; Cainazzo, M. M.; Ferrari, A.; Pani, L.; Guerzoni, S. (2019)                                                                                                            | Cannabis for the treatment of refractory headaches: A case-series of 18 patients                                                                                                              | Unable to confirm details with authors |

|                                                                                                                                                                                                                                                                                                         |                                                                                                                                                                                          |                                        |
|---------------------------------------------------------------------------------------------------------------------------------------------------------------------------------------------------------------------------------------------------------------------------------------------------------|------------------------------------------------------------------------------------------------------------------------------------------------------------------------------------------|----------------------------------------|
| Lofwall, M. R.; Babalonis, S.; Nuzzo, P. A.; Elayi, S. C.; Walsh, S. L. (2016)                                                                                                                                                                                                                          | Opioid withdrawal suppression efficacy of oral dronabinol in opioid dependent humans                                                                                                     | No outcome measure of interest         |
| Maguire, D. R.; France, C. (2017)                                                                                                                                                                                                                                                                       | Impact of delta-9-tetrahydrocannabinol on the reinforcing effects of remifentanyl in rhesus monkeys responding under a food/drug choice procedure                                        | Unable to confirm details with authors |
| Maguire, D. R.; France, C. P. (2018)                                                                                                                                                                                                                                                                    | Reinforcing effects of opioid/cannabinoid mixtures in rhesus monkeys responding under a food/drug choice procedure                                                                       | No outcome measure of interest         |
| Maguire, D. R.; France, C. P. (2016)                                                                                                                                                                                                                                                                    | Interactions between cannabinoid receptor agonists and mu opioid receptor agonists in rhesus monkeys discriminating fentanyl                                                             | No outcome measure of interest         |
| Maguire, D.; Weed, P.; Gerak, L.; France, C. (2017)                                                                                                                                                                                                                                                     | Evaluation of abuse-and overdose-related effects of opioid/cannabinoid mixtures                                                                                                          | Unable to confirm details with authors |
| Manini, A. F.; Yiannoulos, G.; Bergamaschi, M. M.; Hernandez, S.; Olmedo, R.; Barnes, A. J.; Winkel, G.; Sinha, R.; Jutras-Aswad, D.; Huestis, M. A.; Hurd, Y. L. (2015)                                                                                                                                | Safety and pharmacokinetics of oral Cannabidiol when administered concomitantly with intravenous Fentanyl in humans                                                                      | No outcome measure of interest         |
| Manz, J.; Hyakutake, M.; Kelly, E. (2020)                                                                                                                                                                                                                                                               | Calling for Openness to the Study of Cannabis Use in Chronic Pelvic Pain                                                                                                                 | Wrong study design                     |
| McVige, J.; Kaur, D.; Hart, P.; Lillis, M.; Mechtler, L.; Bargnes, V.; Shukri, S. (2019)                                                                                                                                                                                                                | Medical cannabis in the treatment of post-traumatic concussion                                                                                                                           | Unable to confirm details with authors |
| Mechtler, L.; Bargnes, V.; Hart, P.; McVige, J.; Saikali, N. (2019)                                                                                                                                                                                                                                     | Medical cannabis for chronic migraine: A retrospective review                                                                                                                            | Unable to confirm details with authors |
| Mechtler, L.; Hart, P.; Bargnes, V.; Saikali, N. (2019)                                                                                                                                                                                                                                                 | Medical cannabis treatment in patients with trigeminal neuralgia                                                                                                                         | Unable to confirm details with authors |
| Mechtler, L.; Ralyea, C.; Hart, P.; Bargnes, V. (2020)                                                                                                                                                                                                                                                  | Medical cannabis in the treatment of patients with trigeminal neuralgia: An ongoing retrospective study                                                                                  | Unable to confirm details with authors |
| Merlin, J. S.; Long, D.; Becker, W. C.; Cachay, E. R.; Christopolous, K. A.; Claborn, K. R.; Crane, H. M.; Edelman, E. J.; Lovejoy, T. I.; Mathews, W. C.; Morasco, B. J.; Napravnik, S.; O'Cleirigh, C.; Saag, M. S.; Starrels, J. L.; Gross, R.; Liebschutz, J. M. (2019)                             | Marijuana Use Is Not Associated with Changes in Opioid Prescriptions or Pain Severity among People Living with HIV and Chronic Pain                                                      | Wrong study design                     |
| Merlin, J. S.; Samet, J. H.; Cheng, D. M.; Lira, M. C.; Tsui, J. I.; Forman, L. S.; Colasanti, J.; Walley, A. Y.; Del Rio, C.; Liebschutz, J. M. (2019)                                                                                                                                                 | Marijuana Use and Its Associations with Pain, Opioid Dose, and HIV Viral Suppression among Persons Living with HIV on Chronic Opioid Therapy                                             | Wrong study design                     |
| Miller, C.; Foster, C.; Mueller, S. (2015)                                                                                                                                                                                                                                                              | Dronabinol for acute pain management in burn patients that use marijuana                                                                                                                 | Unable to confirm details with authors |
| Minervini, V.; France, C. P. (2016)                                                                                                                                                                                                                                                                     | Behavioral characterization of spiradoline and CP55,940 in rats: Potential of drug mixtures for treating pain                                                                            | Abstract where full paper published    |
| Molaei, M.; Fatahi, Z.; Zaringhalam, J.; Haghparast, A. (2016)                                                                                                                                                                                                                                          | CB1 Cannabinoid Agonist (WIN55,212-2) Within the Basolateral Amygdala Induced Sensitization to Morphine and Increased the Level of mu-Opioid Receptor and c-fos in the Nucleus Accumbens | Wrong intervention                     |
| Mollica, A.; Pelliccia, S.; Famigliani, V.; Stefanucci, A.; Macedonio, G.; Chiavaroli, A.; Orlando, G.; Brunetti, L.; Ferrante, C.; Pieretti, S.; Novellino, E.; Benyhe, S.; Zador, F.; Erdei, A.; Szucs, E.; Samavati, R.; Dvorasko, S.; Tomboly, C.; Ragno, R.; Patsilnakos, A.; Silvestri, R. (2017) | Exploring the first Rimonabant analog-opioid peptide hybrid compound, as bivalent ligand for CB1 and opioid receptors                                                                    | Wrong study design                     |
| Mucke, M.; Phillips, T.; Radbruch, L.; Petzke, F.; Hauser, W. (2018)                                                                                                                                                                                                                                    | Cannabis-based medicines for chronic neuropathic pain in adults                                                                                                                          | Wrong study design                     |
| Mupamombe, C. T.; Nathan, R. A.; Case, A. A.; Walter, M.; Hansen, E. (2019)                                                                                                                                                                                                                             | Efficacy of medical cannabis for cancer-related pain in the elderly: A single-center retrospective analysis                                                                              | Full text unavailable                  |
| Myers, B.; Geist, T.; Aladeen, T.; Westphal, E.; Hart, P.; Zelen, K.; Begley, A.; Rainka, M.; Florea, S.; Mechtler, L. (2020)                                                                                                                                                                           | Medical cannabis in the treatment of Parkinson's disease                                                                                                                                 | Unable to confirm details with authors |
| NCT                                                                                                                                                                                                                                                                                                     | Prospective Blinded Randomized Controlled Trial Evaluating the Outcomes of Cannabinoid (CBD) Roll-on Topical Stick in Primary Total Knee Arthroplasty                                    | Unable to confirm details with authors |
| NCT                                                                                                                                                                                                                                                                                                     | Investigation of Cannabis for Pain and Inflammation in Lung Cancer                                                                                                                       | Clinical trial withdrawn               |
| NCT                                                                                                                                                                                                                                                                                                     | Inhaled Cannabis Versus Fentanyl Buccal Tablets for Management of Breakthrough Pain in Cancer Patients                                                                                   | Unable to confirm details with authors |
| NCT                                                                                                                                                                                                                                                                                                     | Cannabis Versus Oxycodone for Pain Relief                                                                                                                                                | Wrong intervention                     |
| Ngan, T. Y. T.; Litt, M.; Eguzo, K.; Thiel, J. A. (2019)                                                                                                                                                                                                                                                | Patient Outcomes Following Initiation of Medical Cannabis in Women with Chronic Pelvic Pain                                                                                              | Unable to confirm details with authors |
| Nguyen, J. D.; Grant, Y.; Creehan, K. M.; Hwang, C. S.; Vandewater, S. A.; Janda, K. D.; Cole, M.; Taffe, M. A. (2019)                                                                                                                                                                                  | DELTA<sup>9</sup>-tetrahydrocannabinol attenuates oxycodone self-administration under extended access conditions                                                                         | Duplicate                              |
| Nilges, M. R.; Bondy, Z.; Grace, J. A.; Winsauer, P. (2018)                                                                                                                                                                                                                                             | Cannabinoid type-1 receptors can mediate the antinociceptive effects of heroin in nonhuman primates                                                                                      | Abstract where full paper published    |
| Nilges, M. R.; Winsauer, P. (2017)                                                                                                                                                                                                                                                                      | Persistent potentiation of the analgesic effects of opioids by delta-9Tetrahydrocannabinol (THC) in nonhuman primates                                                                    | Abstract where full paper published    |
| O'Connell, M.; Sandgren, M.; Frantzen, L.; Bower, E.; Erickson, B. (2019)                                                                                                                                                                                                                               | Medical Cannabis: Effects on Opioid and Benzodiazepine Requirements for Pain Control                                                                                                     | No cannabis dose reported              |
| Okusanya, B. O.; Asaolu, I. O.; Ehiri, J. E.; Kimaru, L. J.; Okechukwu, A.; Rosales, C. (2020)                                                                                                                                                                                                          | Medical cannabis for the reduction of opioid dosage in the treatment of non-cancer chronic pain: A systematic review                                                                     | Wrong study design                     |
| Ozdemir, E. (2020)                                                                                                                                                                                                                                                                                      | The role of the cannabinoid system in opioid analgesia and tolerance                                                                                                                     | Wrong study design                     |

|                                                                                                                                                                                                                                                                 |                                                                                                                                                                                                               |                                        |
|-----------------------------------------------------------------------------------------------------------------------------------------------------------------------------------------------------------------------------------------------------------------|---------------------------------------------------------------------------------------------------------------------------------------------------------------------------------------------------------------|----------------------------------------|
| Pawasarat, I. M.; Schultz, E. M.; Frisby, J. C.; Mehta, S.; Angelo, M. A.; Hardy, S. S.; Kim, T. W. B (2020)                                                                                                                                                    | The Efficacy of Medical Marijuana in the Treatment of Cancer-Related Pain                                                                                                                                     | Wrong intervention                     |
| Pearson, B. (2018)                                                                                                                                                                                                                                              | Cannabis use as an alternative for opioids, antipsychotics and antidepressants among geriatric patients in a long-term care setting: A case series                                                            | Full text unavailable                  |
| Perez, J.; Olivier, S.; Rampakakis, E.; Borod, M.; Shir, Y. (2016)                                                                                                                                                                                              | The McGill university health centre cancer pain clinic: A retrospective analysis of an interdisciplinary approach to cancer pain management                                                                   | Wrong study design                     |
| Pirasteh, A.; Molaee, M.; Haghparast, A. (2015)                                                                                                                                                                                                                 | Effect of intra-BLA administration of CB1 cannabinoid receptor agonist on sensitization to antinociceptive effect of morphine and expression of m-opioid receptor in the nucleus accumbens                    | Abstract where full paper published    |
| Poli, P.; Crestani, F.; Salvadori, C.; Valenti, I.; Sannino, C. (2018)                                                                                                                                                                                          | Medical cannabis in patients with chronic pain: Effect on pain relief, pain disability, and psychological aspects. A prospective non randomized single arm clinical trial                                     | Wrong intervention                     |
| Poli, P.; Salvadori, C.; Sannino, C. (2018)                                                                                                                                                                                                                     | Effects of cannabis based drugs on chronic neuropathic pain: Comparison between italian and dutch medical cannabis variety                                                                                    | Unable to confirm details with authors |
| Portman, D.; Donovan, K. A.; Bobonis, M. (2020)                                                                                                                                                                                                                 | Medical Cannabis as an Effective Treatment for Refractory Symptoms of Paraneoplastic Stiff Person Syndrome                                                                                                    | Wrong study design                     |
| Pritchard, E. R.; Dayer, L.; Belz, J.; Forseth, B.; Harrington, S. E.; Painter, J. T. (2020)                                                                                                                                                                    | Effect of cannabis on opioid use in patients with cancer receiving palliative care                                                                                                                            | Wrong intervention                     |
| Renard, O.; Chvetzoff, G.; Corbin, S.; Drouet, Y.; Lasset, C. (2019)                                                                                                                                                                                            | Cannabis and analgesic management: What are the consequences for the prescription of strong opioids? Observational study at the Léon-Bérard center in a lung cancer patients cohort                           | Wrong study design                     |
| Robinson, D.; Garti, A.; Yassin, M. (2016)                                                                                                                                                                                                                      | Cannabis treatment of diabetic neuropathy: Treatment effect and change in health over a 6 month period                                                                                                        | Unable to confirm details with authors |
| Rogers, A. H.; Bakhshaie, J.; Buckner, J. D.; Orr, M. F.; Paulus, D. J.; Ditte, J. W.; Zvolensky, M. J. (2019)                                                                                                                                                  | Opioid and Cannabis Co-Use among Adults with Chronic Pain: Relations to Substance Misuse, Mental Health, and Pain Experience                                                                                  | Wrong study design                     |
| Ron, A.; Abuhasira, R.; Novack, V. (2019)                                                                                                                                                                                                                       | Establishment of a specialized geriatric clinic providing medical cannabis                                                                                                                                    | Unable to confirm details with authors |
| Runner, R. P.; Luu, A. N.; Nassif, N. A.; Scudday, T. S.; Patel, J. J.; Barnett, S. L.; Gorab, R. S. (2020)                                                                                                                                                     | Use of Tetrahydrocannabinol and Cannabidiol Products in the Perioperative Period Around Primary Unilateral Total Hip and Knee Arthroplasty                                                                    | Wrong study design                     |
| Salottolo, K.; Peck, L.; Tanner, A.; Il; Carrick, M. M.; Madayag, R.; McGuire, E.; Bar-Or, D. (2018)                                                                                                                                                            | The grass is not always greener: A multi-institutional pilot study of marijuana use and acute pain management following traumatic injury                                                                      | Wrong study design                     |
| Serpell, M.; Ratcliffe, S.; Hovorka, J.; Schofield, M.; Taylor, L.; Lauder, H.; Ehler, E. (2014)                                                                                                                                                                | A double-blind, randomized, placebo-controlled, parallel group study of THC/CBD spray in peripheral neuropathic pain treatment                                                                                | Unable to confirm details with authors |
| Shah, A.; Craner, J.; Cunningham, J. L. (2017)                                                                                                                                                                                                                  | Medical cannabis use among patients with chronic pain in an interdisciplinary pain rehabilitation program: Characterization and treatment outcomes                                                            | Wrong study design                     |
| Sing, D. C.; Tornetta, P.; Hansen, E. N. (2020)                                                                                                                                                                                                                 | The Role of Cannabis in Orthopedic Surgery                                                                                                                                                                    | Wrong study design                     |
| Slivicki, R. A.; Iyer, V.; Mali, S. S.; Garai, S.; Thakur, G. A.; Crystal, J. D.; Hohmann, A. G. (2020)                                                                                                                                                         | Positive Allosteric Modulation of CB <sub>1</sub> Cannabinoid Receptor Signaling Enhances Morphine Antinociception and Attenuates Morphine Tolerance Without Enhancing Morphine- Induced Dependence or Reward | Wrong intervention                     |
| Smaga, S.; Gharib, A. (2017)                                                                                                                                                                                                                                    | In adults with chronic low back pain, does the use of inhaled cannabis reduce overall opioid use?                                                                                                             | Unable to confirm details with authors |
| Solomon, G. D.; Solomon, C. S. (2019)                                                                                                                                                                                                                           | Medical cannabis and chronic pain                                                                                                                                                                             | Wrong study design                     |
| Sturgeon, J.; Hah, J.; Hilmoe, H.; Abrams, D.; Mackey, S.; Ware, M. (2018)                                                                                                                                                                                      | Clinical profiles of cannabis use in individuals with chronic pain: A CHOIR study                                                                                                                             | Wrong study design                     |
| Szymaszkiewicz, Agata; Świerczyński, Mikołaj; Talar, Marcin; Polepally, Prabhakar Reddy; Zjawiony, Jordan K.; Fichna, Jakub; Zielińska, Marta (2021)                                                                                                            | Critical interactions between opioid and cannabinoid receptors during tolerance and physical dependence development to opioids in the murine gastrointestinal tract: proof of concept                         | No outcome measure of interest         |
| Thompson, A. L.; Contreras, J. R.; Sorenson, J.; Lane, A. C.; Vanderah, T. (2020)                                                                                                                                                                               | Role of opioids and cannabinoids in a murine model of bone fracture                                                                                                                                           | Unable to confirm details with authors |
| Vigil, J. M.; Stith, S. S.; Adams, I. M.; Reeve, A. P. (2017)                                                                                                                                                                                                   | Associations between medical cannabis and prescription opioid use in chronic pain patients: A preliminary cohort study                                                                                        | Wrong study design                     |
| Webster, E. M.; Yadav, G. S.; Gysler, S.; McNamara, B.; Black, J.; Tymon-Rosario, J.; Zeybek, B.; Han, C.; Arkfeld, C. K.; Andikyan, V.; Menderes, G.; Huang, G.; Azodi, M.; Silasi, D. A.; Santin, A. D.; Schwartz, P. E.; Ratner, E. S.; Altwerger, G. (2020) | Prescribed medical cannabis in women with gynecologic malignancies: A single-institution survey-based study                                                                                                   | Wrong study design                     |
| Weed, P. F.; Gerak, L. R.; France, C. P. (2018)                                                                                                                                                                                                                 | Ventilatory-depressant effects of opioids alone and in combination with cannabinoids in rhesus monkeys                                                                                                        | No outcome measure of interest         |
| Withey, S. L.; Bergman, J. (2017)                                                                                                                                                                                                                               | Effects of cannabinoid receptor agonists on the antinociceptive effects of oxycodone in squirrel monkeys                                                                                                      | Full text unavailable                  |
| Yu, Y.; Tsang, Q.; Lomax, A. E.; Vanner, S.; Reed, D. E. (2020)                                                                                                                                                                                                 | Synergistic interactions of cannabinoids and opioids potentiate analgesia in mouse colonic nociception                                                                                                        | Full text unavailable                  |
| Zador, F.; Wollemann, M. (2015)                                                                                                                                                                                                                                 | Receptome: Interactions between three pain-related receptors or the "triumvirate" of cannabinoid, opioid and TRPV1 receptors                                                                                  | Wrong study design                     |
| Zylla, D. M.; Eklund, J.; Gilmore, G.; Gavenda, A.; Vazquez-Benitez, G.; Pawloski, P. A.; Arneson, T.; Birnbaum, A.; Dahmer, S.; Tracy, M.; Dudek, A. Z. (2019)                                                                                                 | A randomized trial of medical cannabis (MC) in patients with advanced cancer (AC) to assess impact on opioid use and cancer-related symptoms                                                                  | Abstract where full paper published    |

Appendix 3. PRISMA diagram showing study identification

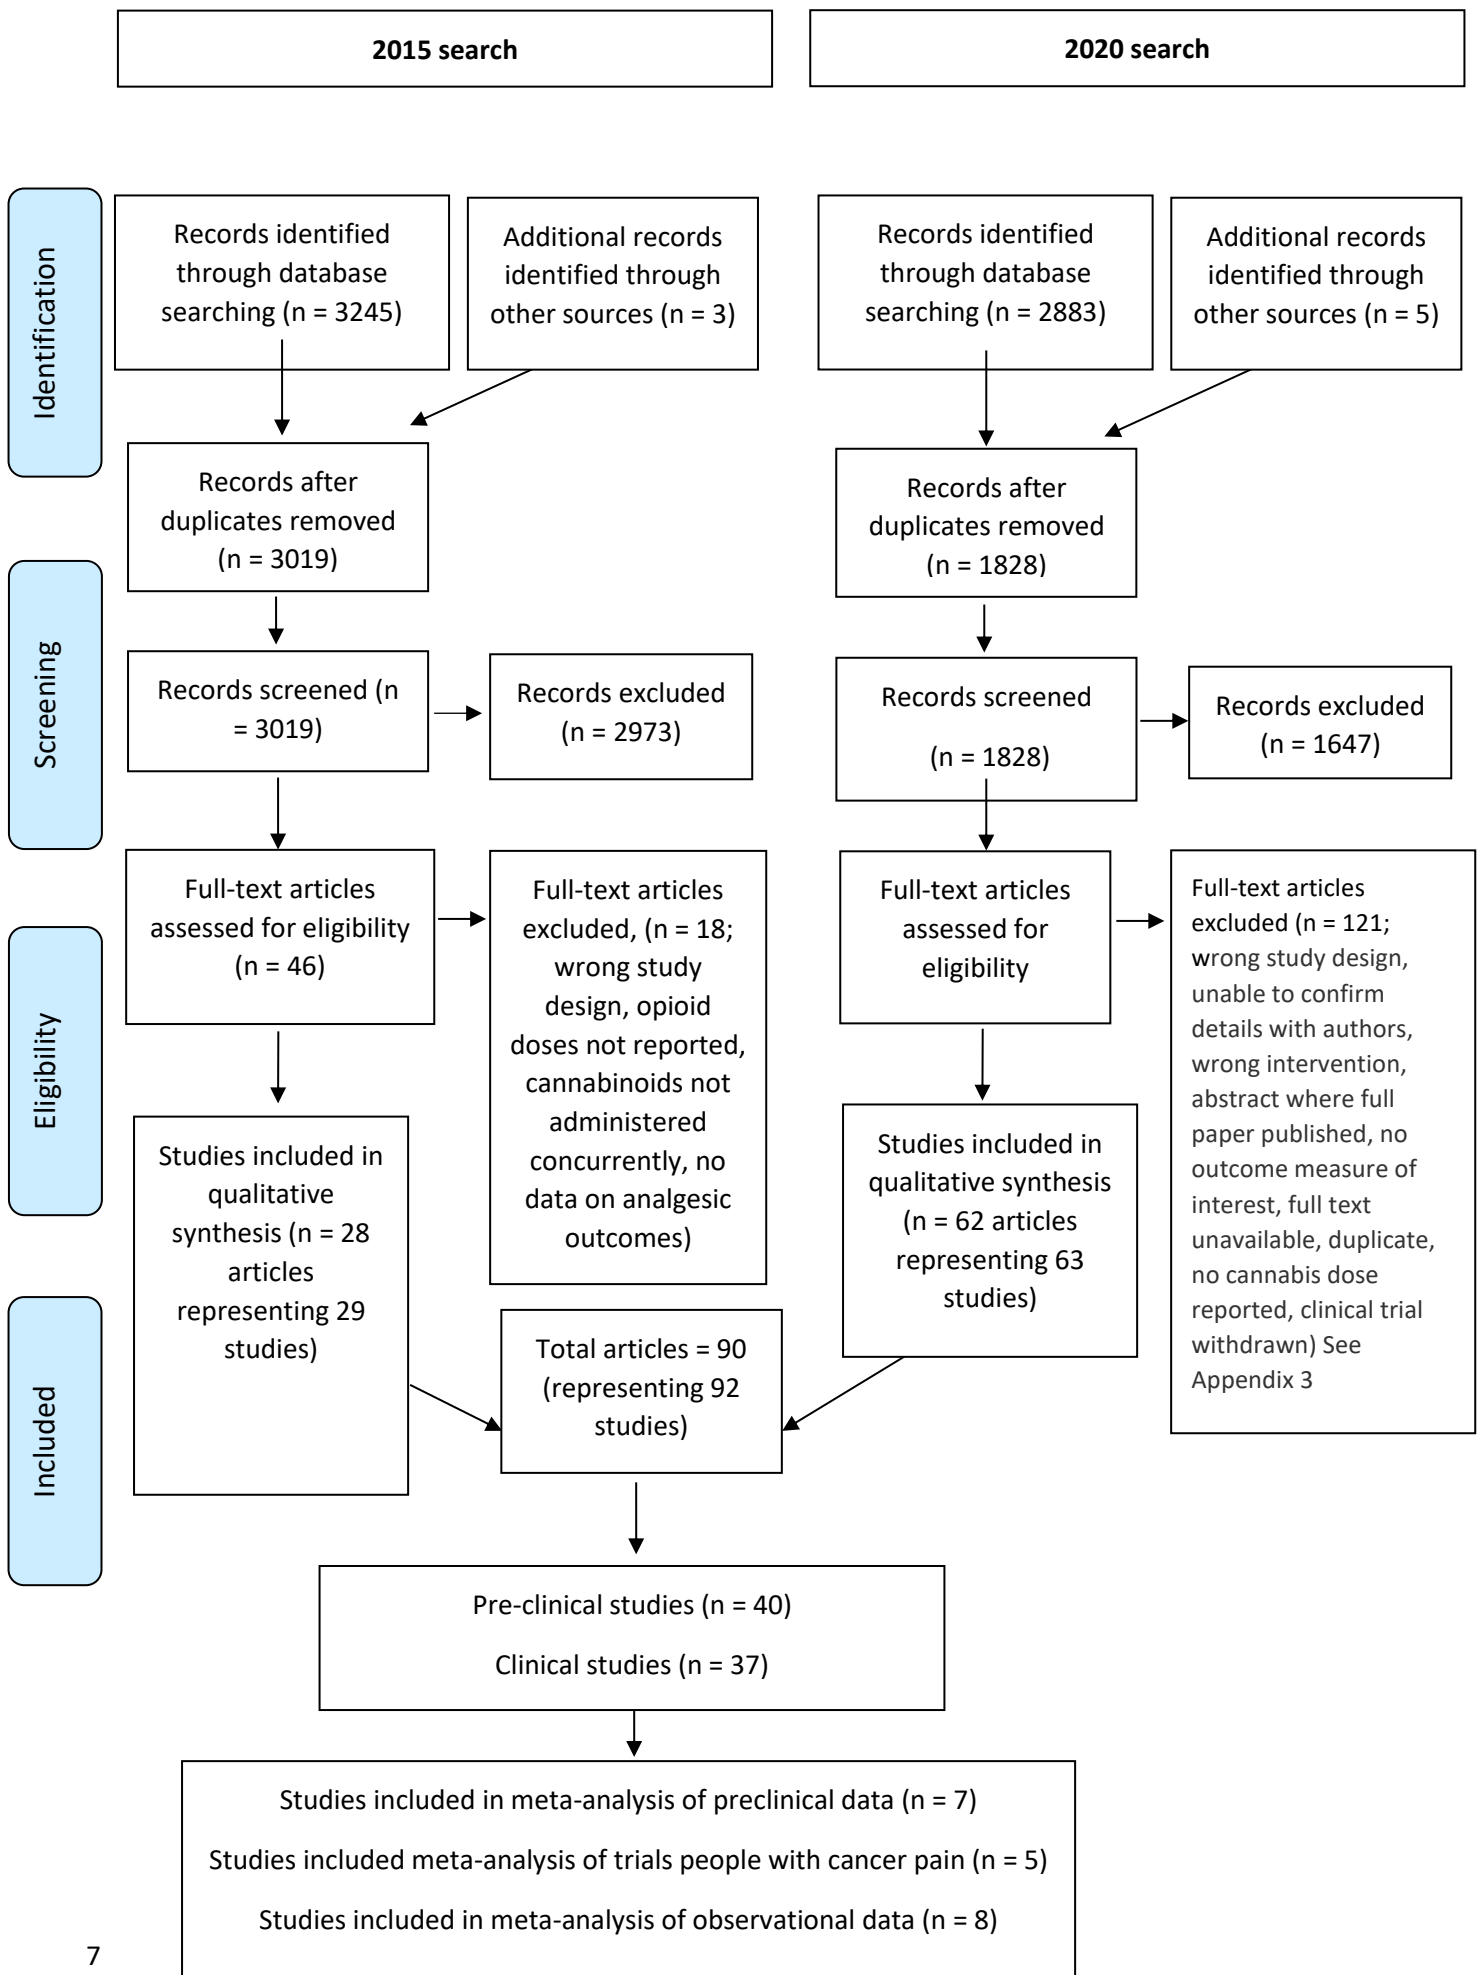

## Appendix 4. Preclinical studies

| Study        | Species and pain model if relevant                                                                                       | Behavioural Measure/Pain Assay                                                    | Equipotent opioid dose represented as ED50(95% CL) or ± SEM, unless measured otherwise specified |                                                                         | Cannabinoid condition                                                                                           | Vehicle condition                                                                                               | Potency ratio or evidence of synergism                     | Other notes                                                                                                                                                                                                                                                                                                                                                                                                                                                                                                                                                                                                                                                                                                                                                                       |
|--------------|--------------------------------------------------------------------------------------------------------------------------|-----------------------------------------------------------------------------------|--------------------------------------------------------------------------------------------------|-------------------------------------------------------------------------|-----------------------------------------------------------------------------------------------------------------|-----------------------------------------------------------------------------------------------------------------|------------------------------------------------------------|-----------------------------------------------------------------------------------------------------------------------------------------------------------------------------------------------------------------------------------------------------------------------------------------------------------------------------------------------------------------------------------------------------------------------------------------------------------------------------------------------------------------------------------------------------------------------------------------------------------------------------------------------------------------------------------------------------------------------------------------------------------------------------------|
|              |                                                                                                                          |                                                                                   | Opioid administered                                                                              | Cannabinoid administered                                                |                                                                                                                 |                                                                                                                 |                                                            |                                                                                                                                                                                                                                                                                                                                                                                                                                                                                                                                                                                                                                                                                                                                                                                   |
| Alsalem 2019 | Adult male Sprague-Dawley Rats. All received intraplantar CFA to left hindpaw (inflammation)                             | Von Frey filament test (mechanical allodynia).                                    | Morphine I.P. (0.32, 1, 3.2 mg/kg)                                                               | CP55940 I.P. (0.032, 0.1, 0.32 mg/kg)                                   | Not determined (dose-response used to determine minimum dose required to produce analgesia, MPE not determined) | Not determined (dose-response used to determine minimum dose required to produce analgesia, MPE not determined) | Potential synergy                                          | Subtherapeutic doses of opioids used to assess changes in potency/efficacy of CP55940. Morphine (0.32mg/kg) increased efficacy and potency of CP55940 antinociception compared with vehicle, but tramadol had no effect at any dose tested. Values in red indicate doses of drug that produced antinociceptive effect when administered independently (single drug). In a separate group of rats, neither morphine nor tramadol in combination with CP55940 had an effect on intracranial self-stimulation, indicating these combinations are unlikely to increase the risk of abuse liability.                                                                                                                                                                                   |
|              |                                                                                                                          |                                                                                   | Tramadol I.P. (1, 3.2, 10 mg/kg)                                                                 | CP55940 I.P. (0.032, 0.1, 0.32 mg/kg)                                   | Not determined (dose-response used to determine minimum dose required to produce analgesia, MPE not determined) | Not determined (dose-response used to determine minimum dose required to produce analgesia, MPE not determined) | No change in potency                                       |                                                                                                                                                                                                                                                                                                                                                                                                                                                                                                                                                                                                                                                                                                                                                                                   |
| Alsalem 2020 | Adult Male Sprague-Dawley rats (180-250g). CFA (inflammation) or saline (control) injected intraplantar to left hindpaw. | Von Frey filament test (mechanical nociception) and open field test (locomotion). | Morphine (0.32, 1, 3.2 mg/kg)                                                                    | WIN55212 (0.1, 0.32, 1 mg/kg)                                           | Not Determined                                                                                                  | Not Determined                                                                                                  | No change in potency                                       | Subtherapeutic dose of opioids used to assess changes in potency/efficacy of WIN55212 and HU210 when given in combination compared with vehicle (no opioid). Values in red indicate doses of drug that produced antinociceptive effect when administered independently. <b>CFA:</b> Morphine and Tramadol displayed a trend to increase the efficacy of HU210 at its highest dose tested (1mg/kg), but this did not reach significance. <b>STZ:</b> morphine/HU210 displayed a trend for subadditivity. Subtherapeutic dose of Tramadol (1mg/kg) increased the efficacy of WIN55212 only at the highest dose tested (1mg/kg), suggesting potential synergy. <b>Open Field:</b> Neither opioid affected the locomotor deficits displayed by increasing doses of HU210 or WIN55212. |
|              |                                                                                                                          |                                                                                   | Tramadol (1, 3.2, 10 mg/kg)                                                                      | WIN55212 (0.1, 0.32, 1 mg/kg)                                           | Not Determined                                                                                                  | Not Determined                                                                                                  | No change in potency                                       |                                                                                                                                                                                                                                                                                                                                                                                                                                                                                                                                                                                                                                                                                                                                                                                   |
|              |                                                                                                                          |                                                                                   |                                                                                                  | HU210 (0.1, 0.32, 1 mg/kg)                                              | Not Determined                                                                                                  | Not Determined                                                                                                  | No change in potency                                       |                                                                                                                                                                                                                                                                                                                                                                                                                                                                                                                                                                                                                                                                                                                                                                                   |
|              | Adult Male Sprague-Dawley rats (180-250g). Streptosotocin (STZ; diabetic neuropathy) or vehicle (control) injected I.P.  | Von Frey filament test (mechanical nociception) and open field test (locomotion). | Morphine (0.32, 1, 3.2 mg/kg)                                                                    | WIN55212 (0.1, 0.32, 1 mg/kg)                                           | Not Determined                                                                                                  | Not Determined                                                                                                  | No change in potency                                       |                                                                                                                                                                                                                                                                                                                                                                                                                                                                                                                                                                                                                                                                                                                                                                                   |
|              |                                                                                                                          |                                                                                   | Tramadol (1, 3.2, 10 mg/kg)                                                                      | WIN55212 (0.1, 0.32, 1 mg/kg)                                           | Not Determined                                                                                                  | Not Determined                                                                                                  | No, interaction possibly subadditive.                      |                                                                                                                                                                                                                                                                                                                                                                                                                                                                                                                                                                                                                                                                                                                                                                                   |
|              |                                                                                                                          |                                                                                   |                                                                                                  | HU210 (0.1, 0.32, 1 mg/kg)                                              | Not Determined                                                                                                  | Not Determined                                                                                                  | Potential synergy (see comment)                            |                                                                                                                                                                                                                                                                                                                                                                                                                                                                                                                                                                                                                                                                                                                                                                                   |
|              |                                                                                                                          |                                                                                   | HU210 (0.1, 0.32, 1 mg/kg)                                                                       | Not Determined                                                          | Not Determined                                                                                                  | No change in potency                                                                                            |                                                            |                                                                                                                                                                                                                                                                                                                                                                                                                                                                                                                                                                                                                                                                                                                                                                                   |
| Altun 2015   | Adult Male Wistar Rats Naïve, Control or Morphine Dependent. No injury model.                                            | Tail-flick and hot-plate tests (thermal nociception)                              | Morphine S.C. (5mg/kg)                                                                           | ACEA I.P. (5mg/kg), JTE907 (5 mg/kg), AM251 (1 mg/kg), JWH-015(5 mg/kg) | Not Determined, single doses used in all conditions                                                             | Not Determined, single doses used in all conditions                                                             | Interaction unclear, potentially subadditive (see comment) | Single doses of opioid and cannabinoids administered either alone or in combination. Both cannabinoids in combination with morphine increased antinociception compared with morphine alone on tail-flick and hot-plate tests. Interaction unclear since both cannabinoids displayed strong antinociceptive properties, similar to morphine, when delivered alone. CB1R and CB2R antagonists reduced morphine antinociception on both tail-flick and hotplate tests. In assays of morphine tolerance, both cannabinoids enhanced morphine tolerance whilst both antagonists reduced morphine tolerance.                                                                                                                                                                            |



|                  |                                                                                                                        |                                                                                                                                                            |                                                    |                                                                                  |                                                              |                                                                                           |                                                                                                      |                                                                                                                                                                                                                                                                                                                                                                                                   |
|------------------|------------------------------------------------------------------------------------------------------------------------|------------------------------------------------------------------------------------------------------------------------------------------------------------|----------------------------------------------------|----------------------------------------------------------------------------------|--------------------------------------------------------------|-------------------------------------------------------------------------------------------|------------------------------------------------------------------------------------------------------|---------------------------------------------------------------------------------------------------------------------------------------------------------------------------------------------------------------------------------------------------------------------------------------------------------------------------------------------------------------------------------------------------|
| Auh 2016         | Adult Male Sprague-Dawley Rats. CFA injected intraplantar into right hindpaw                                           | Randall-Selitto Pressure Test (Mechanical nociception)                                                                                                     | DAMGO, Intraplantar (0.001-1mg)                    | ACPA, Intraplantar (0.001 - 2mg). ED50 calculated as 111.6 ( $\pm$ 2.18) $\mu$ g | 128.4 $\pm$ 2.28 $\mu$ g (ED50 of ACPA/DAMGO in combination) | 57.4 $\pm$ 2.49 $\mu$ g (ED50 of DAMGO alone) and 111.6 $\pm$ 2.18 $\mu$ g for ACPA alone | ED50 increased above predicted additive effect. Drug interaction is subadditive.                     | 1:1.9 fixed ratio combinations relative to potency (ED50) of DAMGO: ACPA. The experimentally derived ED50 was compared with the theoretical additive ED50 using isobolographic analysis.                                                                                                                                                                                                          |
| Chen 2019        | Male Swiss-Webster Mice                                                                                                | Formalin pain assay (5% formalin solution injected S.C. to dorsal side of left hindpaw). Measured late phase licking (20-35 mins post formalin injection). | Morphine, S.C. (0.5-10 mg/kg)                      | WIN55212-2; S.C. (0.5-5 mg/kg)                                                   | 0.13 (0.11-0.18) mg/kg                                       | 0.43 (0.32-0.71) mg/kg                                                                    | ED50 was below predicted additive value. Interaction is synergistic.                                 | Morphine & WIN55212-2 produced dose-dependent antinociception when administered alone. 1:1 fixed ratio combinations and experimentally derived ED50 for this combination was compared with the theoretical additive ED50 using isobolographic analysis. Synergy was shown to be mediated by CB1 receptors.                                                                                        |
|                  |                                                                                                                        |                                                                                                                                                            |                                                    | GP1a (CB2R agonist & FAAH inhibitor); S.C. (1, 5, 10 mg/kg)                      |                                                              | Not determined                                                                            | Not reported                                                                                         | Drug interaction was subadditive                                                                                                                                                                                                                                                                                                                                                                  |
|                  | Male Sprague-Dawley Rats. Carrageenan inflammatory pain assay; Carrageenan (2%) injected intraplantar to left hindpaw. | Thermal nociception and oedema measured with beam of radiant heat (Hargreaves test) and plethysometer (respectively).                                      | Morphine, S.C. (3 mg/kg)                           | WIN55212-2; I.P. (1-5 mg/kg)                                                     | Not determined                                               | 3.37 (2.45-4.44) mg/kg                                                                    | No evidence of synergy                                                                               | Morphine produced analgesia in a dose-dependent manner but had no effect on oedema. Neither WIN55212-2 nor GP1a had analgesic activity and had no effect on oedema. Single dose of morphine combined with 3 doses of WIN55212-2 had no effect on morphine analgesia and did not improve oedema. Single dose combination of morphine/GP1a increased morphine analgesia but did not improve oedema. |
|                  |                                                                                                                        |                                                                                                                                                            |                                                    | inhibitor); I.P. (5 mg/kg) GP1a (CB2R agonist & FAAH                             |                                                              | Not determined                                                                            | Not reported                                                                                         | Potential evidence of synergy (see notes)                                                                                                                                                                                                                                                                                                                                                         |
| Cichewicz 1999   | Male ICR mice (no injury model)                                                                                        | Tail-flick test                                                                                                                                            | morphine p.o.                                      | delta-9-THC (20 mg/kg p.o.)                                                      | 13.1 mg/kg (8.8, 19.5)                                       | 28.8 mg/kg (20.2, 41)                                                                     | Potency ratio: 2.2                                                                                   |                                                                                                                                                                                                                                                                                                                                                                                                   |
|                  |                                                                                                                        |                                                                                                                                                            | codeine p.o.                                       | delta-9-THC (20 mg/kg p.o.)                                                      | 5.9 mg/kg (1.4, 24.9)                                        | 139.9 mg/kg (75.2, 260.5)                                                                 | Potency ratio: 25.8                                                                                  |                                                                                                                                                                                                                                                                                                                                                                                                   |
|                  |                                                                                                                        |                                                                                                                                                            | oxymorphone p.o.                                   | delta-9-THC (20 mg/kg p.o.)                                                      | 0.5 mg/kg (0.3, 0.8)                                         | 2.6 mg/kg (1.7, 3.9)                                                                      | Potency ratio: 5.0                                                                                   |                                                                                                                                                                                                                                                                                                                                                                                                   |
|                  |                                                                                                                        |                                                                                                                                                            | hydromorphone p.o.                                 | delta-9-THC (20 mg/kg p.o.)                                                      | 0.4 mg/kg (0.2, 0.8)                                         | 5.6 mg/kg (3.2, 9.7)                                                                      | Potency ratio: 12.6                                                                                  |                                                                                                                                                                                                                                                                                                                                                                                                   |
|                  |                                                                                                                        |                                                                                                                                                            | methadone p.o.                                     | delta-9-THC (20 mg/kg p.o.)                                                      | 2.7 mg/kg (1.4, 5.2)                                         | 12.0 mg/kg (8.1, 17.9)                                                                    | Potency ratio: 4.1                                                                                   |                                                                                                                                                                                                                                                                                                                                                                                                   |
|                  |                                                                                                                        |                                                                                                                                                            | LAAM p.o.                                          | delta-9-THC (20 mg/kg p.o.)                                                      | 2.6 mg/kg (1.7, 3.9)                                         | 8.0 mg/kg (6.4, 10.1)                                                                     | Potency ratio: 2.5                                                                                   |                                                                                                                                                                                                                                                                                                                                                                                                   |
|                  |                                                                                                                        |                                                                                                                                                            | heroin p.o.                                        | delta-9-THC (20 mg/kg p.o.)                                                      | 5.4 mg/kg (1.7, 16.9)                                        | 26.1 mg/kg (12.7, 53.4)                                                                   | Potency ratio: 4.1                                                                                   |                                                                                                                                                                                                                                                                                                                                                                                                   |
|                  |                                                                                                                        |                                                                                                                                                            | meperidine p.o.                                    | delta-9-THC (20 mg/kg p.o.)                                                      | 11.1 mg/kg (4.2, 29.4)                                       | 86.2 mg/kg (52.8, 140.6)                                                                  | Potency ratio: 8.9                                                                                   |                                                                                                                                                                                                                                                                                                                                                                                                   |
|                  |                                                                                                                        |                                                                                                                                                            | fentanyl p.o.                                      | delta-9-THC (20 mg/kg p.o.)                                                      | 0.5 mg/kg (0.3, 0.8)                                         | 6.1 mg/kg (estimated from an extrapolated curve)                                          | Not determined (50% MPE not seen)                                                                    |                                                                                                                                                                                                                                                                                                                                                                                                   |
| pentazocine p.o. | delta-9-THC (20 mg/kg p.o.)                                                                                            | 838.6 mg/kg (estimated from an extrapolated curve)                                                                                                         | 625.9 mg/kg (estimated from an extrapolated curve) | Not determined (50% MPE not seen)                                                |                                                              |                                                                                           |                                                                                                      |                                                                                                                                                                                                                                                                                                                                                                                                   |
| Cichewicz 2003   | Male ICR mice                                                                                                          | Tail-flick test                                                                                                                                            | morphine p.o.                                      | delta-9-THC (5-35 mg/kg and 1-27 mg/kg p.o.)                                     | 13.6 mg/kg $\pm$ 1.94                                        | 24.5 mg/kg $\pm$ 4.8                                                                      | For each ratio tested, experimental values were less than the calculated additive values (synergism) | Fixed-ratio combinations of 9-THC with either morphine or codeine were tested for antinociceptive effects. The experimentally derived ED <sub>50</sub> for each combination was compared with the theoretical additive ED <sub>50</sub> , using an isobolographic analysis. All the fixed-ratio combinations tested produced greater                                                              |
|                  |                                                                                                                        |                                                                                                                                                            | codeine p.o.                                       | delta-9-THC (5-30 mg/kg and 5-18 mg/kg p.o.)                                     | 20.1 mg/kg $\pm$ 3.0                                         | 78.2 mg/kg $\pm$ 14.4                                                                     | For each ratio tested, experimental values were less than the calculated additive values (synergism) |                                                                                                                                                                                                                                                                                                                                                                                                   |

|                |                                                                                                                      |                                                                                 |                                                     |                                                                 |                                                                   |                                                                                   | antinociception (synergy) than predicted from simple additivity                                                                                                                                    |                                                                                                                                                                                                                                                                                                                                                                                                                                                                          |
|----------------|----------------------------------------------------------------------------------------------------------------------|---------------------------------------------------------------------------------|-----------------------------------------------------|-----------------------------------------------------------------|-------------------------------------------------------------------|-----------------------------------------------------------------------------------|----------------------------------------------------------------------------------------------------------------------------------------------------------------------------------------------------|--------------------------------------------------------------------------------------------------------------------------------------------------------------------------------------------------------------------------------------------------------------------------------------------------------------------------------------------------------------------------------------------------------------------------------------------------------------------------|
| Cichewicz 2005 | IAF hairless guinea pigs                                                                                             | Pin-prick test                                                                  | fentanyl s.c.                                       | delta-9-THC (50 mg/kg i.p.)                                     | 6.8 µg/kg (3.3, 14.2)                                             | 50.8 µg/kg (41.0, 63.0)                                                           | Greater than additive effect on antinociception. Potency ratio: 6.7 (1.8 to 17.0)                                                                                                                  |                                                                                                                                                                                                                                                                                                                                                                                                                                                                          |
|                |                                                                                                                      |                                                                                 | buprenorphine s.c.                                  | delta-9-THC (50 mg/kg i.p.)                                     | 0.02 mg/kg (0.01, 0.05)                                           | 2.97 mg/kg (1.84, 4.81)                                                           | Greater than additive effect on antinociception. Enhanced potency in a non-parallel fashion                                                                                                        | Not possible to compare the change in potency produced by delta-9-THC due to the non-parallel nature of the two dose-response curves for buprenorphine                                                                                                                                                                                                                                                                                                                   |
|                |                                                                                                                      |                                                                                 | fentanyl t.d.                                       | delta-9-THC (400 mg/kg t.d.)                                    | 2h: 254.9 µg/kg (202.90, 320.6)<br>4h: 176.3 µg/kg (144.3, 215.5) | 2h: 928.6 µg/kg (599.5, 1438.3)<br>4h: 1067.0 µg/kg (840.4, 1356.1)               | Potency ratio at 2h: 3.7<br>Potency ratio at 4h: 5.8                                                                                                                                               |                                                                                                                                                                                                                                                                                                                                                                                                                                                                          |
|                |                                                                                                                      |                                                                                 | buprenorphine t.d.                                  | delta-9-THC (400 mg/kg t.d.)                                    | 2h: 4.3 mg/kg (2.8, 6.8)<br>4h: 2.2 mg/kg (1.1, 4.6)              | 2h: 26.1 mg/kg (17.1, 39.9)<br>4h: 15.6 mg/kg (10.0, 24.5)                        | Potency ratio at 2h: 8.2<br>Potency ratio at 4h: 7.2                                                                                                                                               |                                                                                                                                                                                                                                                                                                                                                                                                                                                                          |
| Cox 2007       | (Male Sprague-Dawley rats)                                                                                           | Paw pressure test                                                               | morphine i.p. (normal rats)                         | delta-9-THC (0.4 mg/kg ± 0.5 i.p.) (1:1 ratio THC:Morphine)     | 0.4 mg/kg ± 0.5                                                   | 2.4 mg/kg (2.2, 2.8)                                                              | The combination of delta-9-THC and morphine showed synergism in both non-arthritic and arthritic rats                                                                                              | Results from normal rats included in the meta-analysis only                                                                                                                                                                                                                                                                                                                                                                                                              |
|                |                                                                                                                      |                                                                                 | morphine i.p. (arthritic rats)                      | delta-9-THC (0.6 mg/kg ± 0.55 i.p.) (1:1 ratio THC:Morphine)    | 0.6 mg/kg ± 0.55                                                  | 2.2 mg/kg (1.9, 2.4).                                                             |                                                                                                                                                                                                    |                                                                                                                                                                                                                                                                                                                                                                                                                                                                          |
| Finn 2004      | Adult male Lister Hooded rats                                                                                        | Formalin evoked nociceptive behavior                                            | morphine i.p.                                       | delta-9-THC (1 mg/kg i.p.)                                      | Not reported                                                      | Not reported                                                                      | Not clearly synergistic. Potentially additive. Morphine (2 mg/kg) + delta-9-THC (1 mg/kg) had a significant effect on nociceptive behavior (compared to morphine alone but not delta-9-THC alone). |                                                                                                                                                                                                                                                                                                                                                                                                                                                                          |
| Grenald 2017   | Male Sprague-Dawley Rats. Acute post-operative pain (incision of left hindpaw, behavioural testing 24hr afterwards). | Hargreaves thermal radiant heat test<br>Von Frey test of mechanical nociception | Morphine, I.P. (1, 3, 10 mg/kg)                     | JWH105, I.P. (1, 3, 10 mg/kg)                                   | 0.14 ± 0.36 mg/kg                                                 | 3.56 ± 8.61 mg/kg                                                                 | 1:1 fixed ratio; leftward shift in dose-effect curve for both thermal and mechanical nociception. Drug interaction is synergistic                                                                  | Isobolographic analysis confirmed synergy between morphine and JW105 in measures of nociception in acute inflammation, post-operative injury and neuropathic pain models but not in thermal nociception of naïve rodents. Study also showed combination treatment reduced drug preference in a conditioned place preference test (measure of addictive potential) and reduce impairments in GI tract transit, tested in rats and compared with morphine treatment alone. |
|                |                                                                                                                      |                                                                                 |                                                     |                                                                 | 0.11 ± 0.41 mg/kg                                                 | 5.02 ± 26.86 mg/kg                                                                |                                                                                                                                                                                                    |                                                                                                                                                                                                                                                                                                                                                                                                                                                                          |
|                | Male Sprague-Dawley Rats. Spared nerve injury model of neuropathic pain                                              | Hargreaves thermal radiant heat test<br>Von Frey test of mechanical nociception | Morphine, I.P. (1, 3, 10 mg/kg)                     | JWH015, I.P. (1, 10, 100 mg/kg)                                 | 0.14 ± 0.36 mg/kg                                                 | 3.94 ± 2.99 mg/kg                                                                 | 1:1 fixed ratio; leftward shift in dose-effect curve for both thermal and mechanical nociception. Drug interaction is synergistic                                                                  |                                                                                                                                                                                                                                                                                                                                                                                                                                                                          |
|                |                                                                                                                      |                                                                                 |                                                     |                                                                 | 0.11 ± 0.41 mg/kg                                                 | 2.56 ± 4.68                                                                       |                                                                                                                                                                                                    |                                                                                                                                                                                                                                                                                                                                                                                                                                                                          |
| ICR Mice       | Tail flick test (thermal nociception)                                                                                | Morphine, I.P. (1, 3, 10 mg/kg)                                                 | JWH015, I.P. (1, 10, 100 mg/kg)                     | 39.2 ± 43.8 mg/kg                                               | 4.47 ± 2.66 mg/kg                                                 | 1:3 fixed ratio combination of morphine:JWH105; Drug interaction is sub-additive. |                                                                                                                                                                                                    |                                                                                                                                                                                                                                                                                                                                                                                                                                                                          |
|                |                                                                                                                      |                                                                                 |                                                     | Formalin flinch test (1.5% formalin injected into left hindpaw) | Morphine, I.P. (0.1, 0.3, 0.6, 1 mg/kg)                           | JWH015, I.P. (0.1, 1, 3, 10, 30, 100 mg/kg)                                       | 0.01 ± 0.02 mg/kg                                                                                                                                                                                  | 0.38 ± 0.33 mg/kg                                                                                                                                                                                                                                                                                                                                                                                                                                                        |
| Iyer 2020      | Adult Male C57BL/6J WT or CB2R KO mice. Paclitaxel model of chemotherapy-induced neuropathic pain                    | Von Frey test of mechanical nociception                                         | Morphine, I.P. (0.42, 0.84, 1.67, 3.34, 6.68 mg/kg) | LY2828360 (CB2R agonist; 0.04, 0.09, 0.19, 0.38, 0.77 mg/kg)    | 1.069 (0.4489-1.343) mg/kg                                        | 6.682 (4.905-9.103) mg/kg                                                         | leftward shift in dose-effect curve and ED50 was lower than the theoretical additive value. Interaction is synergistic                                                                             | 1:1 fixed ratio combination. Also blocked morphine-induced condition place preference, in WT mice but not CB2R KO mice and attenuated naloxone-precipitated withdrawal in chronically treated mice. Combination                                                                                                                                                                                                                                                          |

|                         |                                                                                                                    |                                                                                         |                                                                           |                                                                     |                                                                                                      |                                                                                                       |                                                                                                                                                              |                                                                                                                                                                                                                                                                                                                                                                                                                                                                           |
|-------------------------|--------------------------------------------------------------------------------------------------------------------|-----------------------------------------------------------------------------------------|---------------------------------------------------------------------------|---------------------------------------------------------------------|------------------------------------------------------------------------------------------------------|-------------------------------------------------------------------------------------------------------|--------------------------------------------------------------------------------------------------------------------------------------------------------------|---------------------------------------------------------------------------------------------------------------------------------------------------------------------------------------------------------------------------------------------------------------------------------------------------------------------------------------------------------------------------------------------------------------------------------------------------------------------------|
|                         | Adult Male C57BL/6J WT Naïve mice                                                                                  | Hotplate test of thermal nociception                                                    | Morphine I.P. (1, 3, 10 mg/kg)                                            | LY2828360 (3 mg/kg)                                                 | not determined                                                                                       | not determined                                                                                        | No evidence of synergy                                                                                                                                       | treatment had no effect on morphine-induced impairments in colonic motility or morphine-tolerance.                                                                                                                                                                                                                                                                                                                                                                        |
| Katsuyama 2013          | Male mice of ddY strain                                                                                            | Capsaicin test                                                                          | morphine (1.0 mg/kg s.c. and 100 pmol i.t.)                               | beta-caryophyllene (2.25 mg i.pl., CB2 receptor agonist)            | ID <sub>50</sub> 1.16 mg/kg (1.03, 1.32, systemic, s.c.) and 130.1 pmol (111.9, 156.4, spinal, i.t.) | ID <sub>50</sub> 2.51 mg/kg (2.17, 2.97) (systemic, s.c.) and 193.7 pmol (165.7, 225.6, spinal, i.t.) | Morphine + beta-caryophyllene decreased licking/biting response p<0.05 compared to morphine + saline or beta-caryophyllene + jojoba wax.                     | Ineffective doses of beta-caryophyllene significantly enhanced morphine-induced antinociception                                                                                                                                                                                                                                                                                                                                                                           |
| Kazantzis 2016          | Adult Male C57BL/6 mice. Chronic constriction injury (neuropathic) or sham (control) of left common sciatic nerve. | Von Frey Filament Test (mechanical allodynia)                                           | Morphine, S.C. (1.78-30 mg/kg)                                            | WIN55212, S.C. (0.1-10 mg/kg) ED50 calculated as 2.1 (± 0.08) mg/kg | 3.4 (± 0.1) mg/kg (ED50 of morphine/WIN55212 in combination)                                         | 10.1 (± 0.5) mg/kg (ED50 of morphine alone)                                                           | ED50 was below predicted additive value. Interaction is synergistic.                                                                                         | 1:1 fixed ratio combinations of respective ED50(S) of morphine and WIN55212 (this equated to a 5.6:1 fixed weight ratio of morphine to WIN55212). The experimentally derived ED50 for this combination was compared with the theoretical additive ED50 using isobolographic analysis. When administered in combination, WIN55212 and morphine reduced both mechanical and cold allodynia in a synergistic manner but only had an additive effect on motor incoordination. |
|                         |                                                                                                                    | Acetone test (cold allodynia)                                                           | Morphine, S.C. (1.78-30 mg/kg)                                            | WIN55212, S.C. (0.1-10 mg/kg) ED50 calculated as 1.1 (± 0.07) mg/kg | 2.4 (± 0.1) mg/kg (ED50 of morphine/WIN55212 in combination)                                         | 7.4 (± 0.7) mg/kg (ED50 of morphine alone)                                                            | ED50 was below predicted additive value. Interaction is synergistic.                                                                                         |                                                                                                                                                                                                                                                                                                                                                                                                                                                                           |
|                         |                                                                                                                    | Rotarod test of motor coordination                                                      | Morphine, S.C. (1.78-30 mg/kg)                                            | WIN55212, S.C. (0.1-10 mg/kg) ED50 calculated as 1.2 (± 0.2) mg/kg  | 4.0 (± 0.1) mg/kg (ED50 of morphine/WIN55212 in combination)                                         | 6.1 (± 0.5) mg/kg (ED50 of morphine alone)                                                            | ED50 was not different from predicted additive value. Interaction is additive.                                                                               |                                                                                                                                                                                                                                                                                                                                                                                                                                                                           |
| Li 2008                 | Rhesus monkeys                                                                                                     | Thermal antinociception                                                                 | morphine s.c.                                                             | delta-9-THC (0.32 and 1.0 mg/kg s.c.)                               | ED <sub>80</sub> 2.42 mg/kg                                                                          | ED <sub>80</sub> 6.36 mg/kg (3.81, 8.91)                                                              | Pre-treatment with delta-9-THC enhanced the antinociceptive effects of morphine                                                                              | Morphine dose dependently increased the latency for monkeys to remove their tails from 50°C and 55°C water                                                                                                                                                                                                                                                                                                                                                                |
| Maguire 2013            | Rhesus monkeys                                                                                                     | Warm water tail withdrawal                                                              | morphine s.c.                                                             | CP 55,940 (0.01 mg/kg s.c.)<br>WIN 55,212 (0.32 mg/kg s.c.)         | mean (n = 3)<br>CP 55,940 0.23 mg/kg<br>WIN 55,212 0.24 mg/kg                                        | 1.26 mg/kg (mean, n = 3)                                                                              | Pre-treatment with CP 55,940 resulted in a mean leftward shift to of -6.73-fold. Pre-treatment with WIN 55,212 resulted in mean leftward shift of -5.5-fold. | Antinociception from the combination appeared to be achieved without an increase in abuse liability                                                                                                                                                                                                                                                                                                                                                                       |
| Maguire and France 2016 | Adult Male Sprague Dawley rats (14 months old). No pain model (Naive)                                              | Tail flick test (thermal nociception)                                                   | Spiradoline, I.P. (KOR agonist)                                           | CP55940, I.P                                                        | 1:1 ratio: 3.65 (1.86-7.17) mg/kg; 3:1 ratio: 1.93 (1.14-3.26) mg/kg; 1:3 ratio: 5.98 (3.08-11.64)   | 9.56 ± (3.96-23.07) mg/kg                                                                             | ED50s of each dose ratio combinations fell near the line of additivity and within the 95% CL. Interaction was additive.                                      | Isobolographic analysis of 1:1, 1:3 and 3:1 ratio combination of CP55940/Spiradoline                                                                                                                                                                                                                                                                                                                                                                                      |
| Maguire and France 2018 | Adult Male Sprague Dawley Rats (~ 4 months old)                                                                    | Warm-water tail withdrawal procedure (50 degrees C) to measure thermal antinociception. |                                                                           | CP55940 I.P. (0.04 - 0.58 mg/kg)                                    | 0.0034 [0.0028, 0.0042] mg/kg                                                                        |                                                                                                       | Potency ratio = 1.9 [1.5, 2.3]. Drug interaction is sub-additive with greater than predicted ED50                                                            | Isobolographic analysis was used to assess the nature of interaction between Etorphine/CP55940, Etorphine/THC, Morphine/CP55940 & Morphine/THC. Dose-effect calculated using 3:1, 1:1 or 1:3 equivalent ratio of opioid/cannabinoids. Reported ED50 values & potency ratio [95% confidence interval].                                                                                                                                                                     |
|                         |                                                                                                                    |                                                                                         | Etorphine I.P. (3:1, 0.001 - 0.02; 1:1 0.001 - 0.013; 1:3, 0-0.007 mg/kg) | CP55940 I.P. (0.07 - 1.16 mg/kg)                                    | 0.0021 [0.0015, 0.0029] mg/kg                                                                        | 0.0063 [0.0057, 0.0069] mg/kg                                                                         | Potency ratio = 3.4 [2.1, 4.6]. Drug interaction is additive                                                                                                 |                                                                                                                                                                                                                                                                                                                                                                                                                                                                           |
|                         |                                                                                                                    |                                                                                         | Etorphine I.P. (3:1, 0.001 - 0.02; 1:1 0.001 - 0.013; 1:3, 0-0.007 mg/kg) | CP55940 I.P. (0.11 - 1.73 mg/kg)                                    | 0.0018 [0.0012, 0.0027] mg/kg                                                                        |                                                                                                       | Potency ratio = 4.1 [2.5, 5.8]. Drug interaction is sub-additive with greater than predicted ED50                                                            |                                                                                                                                                                                                                                                                                                                                                                                                                                                                           |
|                         |                                                                                                                    |                                                                                         | Etorphine I.P. (3:1, 0.001 - 0.02; 1:1 0.001 - 0.013; 1:3, 0-0.007 mg/kg) | THC I.P. (1.4 - 21.7 mg/kg)                                         | 0.0045 [0.0036, 0.0057] mg/kg                                                                        | 0.006 [0.0063, 0.0068] mg/kg                                                                          | Potency ratio = 1.5 [1.2, 1.9]. Drug interaction is sub-additive with lower than                                                                             |                                                                                                                                                                                                                                                                                                                                                                                                                                                                           |

|                      |                                            |                                                                                             |                                                                                               |                                   |                                                                              |                         |  |                                                                                                                                                                                                                                                                                                                                                                                                                                             |
|----------------------|--------------------------------------------|---------------------------------------------------------------------------------------------|-----------------------------------------------------------------------------------------------|-----------------------------------|------------------------------------------------------------------------------|-------------------------|--|---------------------------------------------------------------------------------------------------------------------------------------------------------------------------------------------------------------------------------------------------------------------------------------------------------------------------------------------------------------------------------------------------------------------------------------------|
|                      |                                            |                                                                                             | 0.001 - 0.014; <b>1:3</b> , 0-0.005 mg/kg)                                                    |                                   |                                                                              |                         |  | predicted maximal effect and greater than predicted ED50                                                                                                                                                                                                                                                                                                                                                                                    |
|                      |                                            |                                                                                             |                                                                                               | THC I.P. (2.7 - 43.4 mg/kg)       | 0.0035 [0.0025, 0.0048] mg/kg                                                |                         |  | Potency ratio = 2.0 [1.5, 2.6]. Drug interaction is sub-additive with greater than predicted ED50.                                                                                                                                                                                                                                                                                                                                          |
|                      |                                            |                                                                                             |                                                                                               | THC I.P. (4.1 - 48.8 mg/kg)       | 0.003 [0.0026, 0.0034] mg/kg                                                 |                         |  | Potency ratio = 2.2 [1.9, 2.6]. Drug interaction is sub-additive with lower than predicted maximal effect and greater than predicted ED50.                                                                                                                                                                                                                                                                                                  |
|                      |                                            |                                                                                             |                                                                                               | CPP55940 I.P. (0.02 - 0.33 mg/kg) | 3.57 [2.49, 5.13] mg/kg                                                      |                         |  | Potency ratio = 1.9 [1.2, 2.6]. Drug interaction is supra-additive with greater than predicted maximal effect.                                                                                                                                                                                                                                                                                                                              |
|                      |                                            |                                                                                             | Morphine I.P. ( <b>3:1</b> , 1.6 - 25.1; <b>1:1</b> 1 - 16.7; <b>1:3</b> , 0.5 - 8.4 mg/kg)   | CPP55940 I.P. (0.04 - 0.65 mg/kg) | 2.23 [1.52, 3.28] mg/kg                                                      | 6.99 [5.23, 9.36] mg/kg |  | Potency ratio = 2.7 [2.0, 3.5]. Drug interaction is synergistic with lower than predicted ED50.                                                                                                                                                                                                                                                                                                                                             |
|                      |                                            |                                                                                             |                                                                                               | CPP55940 I.P. (0.06 - 0.98 mg/kg) | 1.63 [1.23, 2.16] mg/kg                                                      |                         |  | Potency ratio = 3.7 [2.8, 4.7]. Drug interaction is synergistic with greater than predicted maximal effect.                                                                                                                                                                                                                                                                                                                                 |
|                      |                                            |                                                                                             |                                                                                               | THC I.P. (0.7 - 10.4) mg/kg       | 3.40 [2.14, 5.40] mg/kg                                                      |                         |  | Potency ratio = 2.6 [1.0, 4.2] Drug interaction is additive                                                                                                                                                                                                                                                                                                                                                                                 |
|                      |                                            |                                                                                             | Morphine I.P. ( <b>3:1</b> , 1.3 - 20.9; <b>1:1</b> 0.9 - 14.0; <b>1:3</b> , 0.4 - 7.0 mg/kg) | THC I.P. (1.3 - 20.7) mg/kg       | 2.38, [1.64, 3.46] mg/kg                                                     | 6.68 [4.89, 9.15] mg/kg |  | Potency ratio = 3.5 [1.7, 5.3]. Drug interaction is additive                                                                                                                                                                                                                                                                                                                                                                                |
|                      |                                            |                                                                                             |                                                                                               | THC I.P. (1.9 - 31.0) mg/kg       | 0.87 [0.55, 1.39] mg/kg                                                      |                         |  | Potency ratio = 9.8 [3.9, 15.7]. Drug interaction is additive.                                                                                                                                                                                                                                                                                                                                                                              |
| Minervini et al 2017 | Adult Male Sprague Dawley rats (350 ± 5 g) | Warm-water tail withdrawal procedure (40, 50, 55 degrees C) to measure thermal nociception. | Spiradoline, I.P. (KOR agonist; 0.032-32 mg/kg)                                               | CP55940, I.P. (0.0032-1.0 mg/kg)  | 1:1 ratio: 2.75 ± 0.29; 3:1 ratio: 6.59 ± 0.99; 1:3 ratio: 2.03 ± 0.36 mg/kg | 7.74 mg/kg              |  | ED50s of each fixed dose ratio combinations fell near the line of additivity. Drug interaction is additive.                                                                                                                                                                                                                                                                                                                                 |
| Neelakantan 2015     | Male, Swiss-Webster mice                   | Acetic acid-stimulated stretching                                                           | Morphine I.P. (0.32-10 mg/kg)                                                                 | CBD I.P. (10-40 mg/kg)            | Not reported                                                                 | Not reported            |  | Leftward shift in the observed versus expected dose-effects. Drug interaction is synergistic                                                                                                                                                                                                                                                                                                                                                |
|                      |                                            | acetic acid decreased feeding                                                               | Morphine I.P. (0.1-0.32 mg/kg)                                                                | CBD I.P. (5-40 mg/kg)             | Not reported                                                                 | Not reported            |  | Rightward and downward shift in the observed versus expected dose-effects. Drug interaction is sub-additive.                                                                                                                                                                                                                                                                                                                                |
|                      | Male C57BL/6 mice                          | Hotplate Thermal antinociception                                                            | Morphine, I.P. (1.0-32 mg/kg)                                                                 | CBD, (3.2-32 mg/kg)               | Not reported                                                                 | Not reported            |  | Rightward shift in observed versus expected dose-effects. Drug interaction is sub-additive.                                                                                                                                                                                                                                                                                                                                                 |
|                      |                                            |                                                                                             |                                                                                               |                                   |                                                                              |                         |  | Morphine produced dose-dependent antinociception/analgesia across all behavioural measures. CBD produced dose-dependent antinociception in acetic acid-stretching, partial dose-independent antinociception in acetic acid reduced feeding and had no effect on the hotplate test. Dose-effect of cotreatment calculated using 1:1 dose ratio of morphine/CBD based on the relative potencies of the two drugs in each behavioural measure. |

|                      |                                                                                                                 |                                       |                                                                                       |                                                                                                                     |                                                                                                                  |                                                                                                                  |                                                                                                                              |                                                                                                                                                                                                                                                                                                                                                                                                                                                                                                                                                                                         |
|----------------------|-----------------------------------------------------------------------------------------------------------------|---------------------------------------|---------------------------------------------------------------------------------------|---------------------------------------------------------------------------------------------------------------------|------------------------------------------------------------------------------------------------------------------|------------------------------------------------------------------------------------------------------------------|------------------------------------------------------------------------------------------------------------------------------|-----------------------------------------------------------------------------------------------------------------------------------------------------------------------------------------------------------------------------------------------------------------------------------------------------------------------------------------------------------------------------------------------------------------------------------------------------------------------------------------------------------------------------------------------------------------------------------------|
| Nguyen 2019          | Adult Male and female Wistar Rats (44-48 weeks old)                                                             | Tail flick test (water bath at 52 °C) | Oxycodone, vapour inhalation 100 mg/mL oxycodone;<br><br>Oxycodone, S.C. (1, 2 mg/kg) | Δ9-THC, vapour inhalation 50 ng/mL THC<br><br>D9-THC, I.P. (5, 10 mg/kg)                                            | Not Determined                                                                                                   | Not Determined                                                                                                   | Interaction unclear, possibly additive or synergistic.                                                                       | Δ9-THC/oxycodone produced significantly greater antinociception than oxycodone alone both when injected or when inhaled. THC reduced oxycodone self-administration. It should be noted that rats used in antinociception experiments were not naive to the drugs. Rats that received vapour inhalation of opioids/cannabinoids had previously received vapour inhalation of heroin, oxycodone, methadone and THC in pilot experiments to determine exposure conditions. Rats that received injections of opioids/cannabinoids had previously received chronic vapour inhalation of THC. |
| Nilges 2020          | Adult male rhesus monkeys. Acute thermal antinociception                                                        | Tail-flick (water bath, 52 degrees C) | Heroin, I.M. (0.032 - 0.32 mg/kg)                                                     | D9-THC 0.1 mg/kg<br>D9-THC 0.32 mg/kg<br>D9-THC 1 mg/kg<br>Cannabinol (CBN) 1 - 3.2 mg/kg<br>THC 0.32 + CBN 1 mg/kg | ED50 0.12 (0.06, 0.18) mg/kg.<br>ED50 0.07 (0.04, 0.10) mg/kg.<br>ED50 0.03 (0.026, 0.032) mg/kg.                | ED50 0.1 (0.06, 0.14) mg/kg                                                                                      | No change in potency<br>No change in potency<br>3.6-fold increase in potency<br>No change in potency<br>No change in potency | Δ9-THC potential abolished by CB1 antagonist rimonabant                                                                                                                                                                                                                                                                                                                                                                                                                                                                                                                                 |
| Pugh 1996            | Male ICR mice                                                                                                   | Tail-flick test                       | morphine i.t.                                                                         | delta-9-THC (6 µcg/mouse i.t., inactive analgesic dose)                                                             | 0.01 mcg/mouse                                                                                                   | 0.318 mcg/mouse (2.825, 0.036)                                                                                   | Greater than additive effect observed, clear leftward shift of graph                                                         |                                                                                                                                                                                                                                                                                                                                                                                                                                                                                                                                                                                         |
| Reche 1996           | Swiss albino mice                                                                                               | Tail-flick and hot plate test         | morphine i.p.                                                                         | delta-9-THC i.p.                                                                                                    | NA- Only one dose of morphine (2 mg/kg i.p.) examined. Study measured change in ED <sub>50</sub> of delta-9-THC. | NA- Only one dose of morphine (2 mg/kg i.p.) examined. Study measured change in ED <sub>50</sub> of delta-9-THC. | NA                                                                                                                           | Morphine pre-administration shifted the dose-response curve for delta-9-THC to the left (a 2.5-fold shift for the tail-flick test and a 3-fold shift for the hot plate test). Analgesic effect blocked by SR-141,716 (cannabinoid antagonist) and naloxone                                                                                                                                                                                                                                                                                                                              |
| Rodríguez-Muñoz 201) | Male CD-1 mice. Acute thermal antinociception                                                                   | Tail-flick (water bath (52 degrees C) | Morphine, i.c.v. (6 nmol)                                                             | CBD (cannabidiol) 10 nmol i.c.v                                                                                     | Not determined                                                                                                   | Not determined                                                                                                   | Not determined                                                                                                               | Single doses: CBD increased effect of morphine by 30 % (estimated)                                                                                                                                                                                                                                                                                                                                                                                                                                                                                                                      |
| Sierra 2019          | Adult male C57 mice. Chemotherapy (paclitaxel) induced peripheral neuropathic pain (CIPN). Mechanical allodynia | von Frey filaments                    | SNC80 0.1 mg/kg i.p. (delta-opioid agonist)                                           | HU210 0.05 µg/kg i.p.                                                                                               | Not determined                                                                                                   | Not determined                                                                                                   | Potential synergy (see comment)                                                                                              | Combination of subthreshold doses of HU210 + SNC80 abolished CIPN induced mechanical allodynia                                                                                                                                                                                                                                                                                                                                                                                                                                                                                          |
| Smith 1998           | Male ICR mice                                                                                                   | Tail-flick and hot plate test         | morphine s.c.<br>morphine p.o.                                                        | Tail-flick: delta-9-THC (4 mg/kg s.c.)<br>Tail-flick: delta-9-THC (20 mg/kg p.o.)                                   | 0.29 mg/kg (95% C.I. 0.04, 1.94)<br>2.8 mg/kg (2.0, 3.9)                                                         | 2.81 mg/kg (2.24, 3.53)<br>31.7 mg/kg (22.4, 44.9)                                                               | Potency ratio: 8.5<br>Potency ratio: 7.6                                                                                     | Multiple conditions tested different combinations of s.c and p.o morphine. Only s.c. + s.c. and p.o. + p.o. for the tail-flick test are reported here. A paw withdrawal test was also conducted to demonstrate that enhancement of antinociception was not limited to the tail                                                                                                                                                                                                                                                                                                          |
| Smith 2007           | Male Sprague-Dawley rats                                                                                        | Paw withdrawal test                   | morphine s.c.                                                                         | delta-9-THC (0.75 mg /kg i.p.)                                                                                      | ED <sub>80</sub> morphine + delta-9-THC (0.75 mg/kg)                                                             | ED <sub>80</sub> morphine alone (100 mg/kg)                                                                      | Tolerance to morphine alone rapidly established; no loss of effect with low-dose combinations of morphine + delta-9-THC      | A morphine pellet arm and delta-9-THC alone arm were not reported in this table due to difficulties in comparing doses between morphine formulations                                                                                                                                                                                                                                                                                                                                                                                                                                    |

|                |                                                                      |                               |                                                                                                                                                                                                                                  |                                                                                                                                                                                                                                                                    |                                                                                                                                                                                                                                                    |                                                                                                                                                            |                                                                                                                                                                                                                                                                                                                                    |                                                                                                                                                                                                                                                                                                                                                                                                    |
|----------------|----------------------------------------------------------------------|-------------------------------|----------------------------------------------------------------------------------------------------------------------------------------------------------------------------------------------------------------------------------|--------------------------------------------------------------------------------------------------------------------------------------------------------------------------------------------------------------------------------------------------------------------|----------------------------------------------------------------------------------------------------------------------------------------------------------------------------------------------------------------------------------------------------|------------------------------------------------------------------------------------------------------------------------------------------------------------|------------------------------------------------------------------------------------------------------------------------------------------------------------------------------------------------------------------------------------------------------------------------------------------------------------------------------------|----------------------------------------------------------------------------------------------------------------------------------------------------------------------------------------------------------------------------------------------------------------------------------------------------------------------------------------------------------------------------------------------------|
| Stachtari 2016 | Adult male Wistar rats. Incisional pain model. Thermal hyperalgesia. | Hot plate (52 degrees C)      | Tramadol 10 mg/kg i.p.                                                                                                                                                                                                           | AM1241 1 mg/kg i.p.                                                                                                                                                                                                                                                | Not determined                                                                                                                                                                                                                                     | Not determined                                                                                                                                             | Not determined                                                                                                                                                                                                                                                                                                                     | Single doses: AM1241 did not potentiate effect of tramadol                                                                                                                                                                                                                                                                                                                                         |
| Tham 2005      | Swiss male mice                                                      | Tail-flick and hot plate test | morphine s.c.                                                                                                                                                                                                                    | Tail-flick: CP55,940 (0.1–3 mg/kg s.c.)<br>Hot plate: CP55,940 (0.1–3 mg/kg s.c.)                                                                                                                                                                                  | 3.31 mg/kg<br>7.54 mg/kg                                                                                                                                                                                                                           | 11.3 mg/kg (9.6, 13.4)<br>29.4 mg/kg (27.3, 31.6)                                                                                                          | Analyses showed greater than additive results (synergism)                                                                                                                                                                                                                                                                          |                                                                                                                                                                                                                                                                                                                                                                                                    |
| Wakley 2011    | Male Sprague–Dawley rats                                             | Paw pressure test             | methadone i.p.                                                                                                                                                                                                                   | delta-9-THC (0.32–3.2 mg/kg i.p.)                                                                                                                                                                                                                                  | Not reported (dose response curve shown)                                                                                                                                                                                                           | ED <sub>50</sub> in naïve rats, 1.27 mg/kg (95% C.I. 0.91, 1.91),<br>ED <sub>50</sub> in rats trained for discrimination, 3.49 mg/kg (95% C.I. 2.59, 5.31) | In opioid and delta-9-THC naïve rats, methadone 1.0 mg/kg significantly enhanced antinociceptive effect of delta-9-THC, however this was not observed in rats that were previously trained for drug discrimination tasks.                                                                                                          | The rats trained for drug discrimination tasks had received repeated administration of opioids and cannabinoids over many months and may have been tolerant to drug effects at the doses administered                                                                                                                                                                                              |
| Welch 1992     | Mice                                                                 | Tail-flick and hot plate test | morphine i.t.                                                                                                                                                                                                                    | delta-9-THC (3.133 mcg/mouse)<br>delta-9-THC (6.25 mcg/mouse)<br>delta-8-THC (25 mcg/mouse)<br>levonantradol (0.005mcg/mouse)<br>CP-55,940 (0.01 mcg/mouse)<br>CP-56,667 (0.5 mcg/mouse)<br>11-hydroxy-delta 9-THC (3 mcg/mouse)<br>dextronantradol (25 mcg/mouse) | 0.15 mcg/mouse (0.11, 0.21)<br>0.05 mcg/mouse (0.03, 0.08)<br>0.05 mcg/mouse (0.02, 0.10)<br>0.06 mcg/mouse (0.01, 0.24)<br>0.3 mcg/mouse (0.0, 0.10)<br>0.26 mcg/mouse (0.08, 0.82)<br>0.08 mcg/mouse (0.04, 0.19)<br>0.51 mcg/mouse (0.36, 0.89) | 0.61 mcg/mouse (0.26, 1.44)                                                                                                                                | yes<br>yes<br>yes<br>yes<br>additive<br>additive<br>yes<br>No                                                                                                                                                                                                                                                                      |                                                                                                                                                                                                                                                                                                                                                                                                    |
| Williams 2006  | Male ICR mice                                                        | Tail-flick test               | Study 1: low-dose codeine (30 mg/kg) and morphine (20 mg/kg) and fully efficacious ED <sub>80</sub> , codeine (100 mg/kg) and morphine (80 mg/kg).<br>Study 2: high-dose codeine (200 mg/kg) and morphine (100 mg/kg) (all p.o.) | delta-9-THC (20 mg/kg p.o., inactive analgesic dose)                                                                                                                                                                                                               | ED <sub>80</sub> codeine (30 mg/kg)<br>ED <sub>80</sub> morphine (20 mg/kg)                                                                                                                                                                        | ED <sub>80</sub> codeine (200 mg/kg)<br>ED <sub>80</sub> morphine (100 mg/kg)                                                                              | A low dose of morphine (20 mg/kg) or codeine (30 mg/kg) with a single pre-treatment of an inactive dose of delta-9-THC produced the same efficacy (ED <sub>80</sub> ) as the high doses of each opioid alone. For codeine, delta-9-THC pre-treatment also increased the duration of action of the ED <sub>80</sub> dose of codeine | Study 1: Pre-treatment with delta-9-THC did not enhance the fully efficacious dose of morphine but enhanced low-dose morphine and both doses of codeine, in addition to extending the time course.<br>Study 2: delta-9-THC restored analgesic efficacy after the time that the opioids had ceased being effective on their own (360 mins post dose for morphine and 120 min post dose for codeine) |
| Williams 2008  | Diabetic and non-diabetic mice and rats                              | Tail-flick test               | morphine s.c.<br>morphine s.c.                                                                                                                                                                                                   | delta-9-THC (20 mg/kg p.o.) in non-diabetic mice<br>delta-9-THC (20 mg/kg p.o.) in diabetic mice                                                                                                                                                                   | 2.5 mg/kg (1.8, 3.4)<br>0.84 mg/kg (0.79, 0.89)                                                                                                                                                                                                    | 5.6 mg/kg (4.3, 7.2)<br>6.1 mg/kg (5.2, 7.1)                                                                                                               | Yes<br>Yes                                                                                                                                                                                                                                                                                                                         | delta-9-THC significantly enhanced morphine-induced antinociception in both diabetic and non-diabetic mice                                                                                                                                                                                                                                                                                         |
| Wilson 2008    | Male Sprague–Dawley rats                                             | Hot plate test                | morphine microinjections into PAG                                                                                                                                                                                                | HU-210 (5 µg)                                                                                                                                                                                                                                                      | Not reported (dose response curve shown)                                                                                                                                                                                                           | Not reported (dose response curve shown)                                                                                                                   | No evidence of synergism. Morphine + HU-210 showed the greatest increase in hot plate latency (39.9 s ± 1.1 s), but was not significantly                                                                                                                                                                                          | HU-210 shown to prevent development of tolerance to morphine's antinociceptive effects. HU-210 pre-treatment enhanced subsequent morphine antinociception. Co-administration of HU-210 into the PAG attenuated morphine                                                                                                                                                                            |

|               |                                                                                            |                                                                          |                                |                                                                   |                                                                                                                              |                                                                                      |                                                                                                                                                              |                                                                                                                                                                                                                                                                                                                                                                                                                                                                                                                                                                                                                                   |
|---------------|--------------------------------------------------------------------------------------------|--------------------------------------------------------------------------|--------------------------------|-------------------------------------------------------------------|------------------------------------------------------------------------------------------------------------------------------|--------------------------------------------------------------------------------------|--------------------------------------------------------------------------------------------------------------------------------------------------------------|-----------------------------------------------------------------------------------------------------------------------------------------------------------------------------------------------------------------------------------------------------------------------------------------------------------------------------------------------------------------------------------------------------------------------------------------------------------------------------------------------------------------------------------------------------------------------------------------------------------------------------------|
|               |                                                                                            |                                                                          |                                |                                                                   |                                                                                                                              |                                                                                      | different from morphine alone (33.1 s ±4.0 s)                                                                                                                | antinociception. The authors suggested that opioids and cannabinoids may have opposing actions within the PAG                                                                                                                                                                                                                                                                                                                                                                                                                                                                                                                     |
| Yesilurt 2003 | Adult female Bulb-C mice                                                                   | Tail-flick test                                                          | morphine topical               | WIN 55, 212-2 (20 mg/ml, topical, mixed CB1-CB2 receptor agonist) | morphine (20 mg/ml) + WIN sustained analgesic effect of 50% analgesia over 4 hours                                           | morphine (20 mg/ml) alone produced 18% analgesic effect, peak at 20 min then reduced | Antinociceptive effects were markedly potentiated (they peaked and were sustained at 30 min) compared to morphine response alone                             |                                                                                                                                                                                                                                                                                                                                                                                                                                                                                                                                                                                                                                   |
| Yuill 2017    | Adult Male C57BL6/J Mice (8-14 weeks).                                                     | Formalin test of inflammatory pain (2.5% intraplantar to single hindpaw) | Morphine, I.P. (0.01-10 mg/kg) | JWH-133, I.P. (CB2R agonist; 0.01-10 mg/kg)                       | Acute (phase I formalin response) = 0.7236 ± 0.11 mg/kg;<br>Inflammatory (phase II formalin response) = 0.6211 ± 0.063 mg/kg | Not reported                                                                         | Antinociception on both acute and inflammatory formalin phases did not differ significantly from the predicted additive value. Drug interaction is additive. | JWH-133 produced dose-dependent antinociception during both acute and inflammatory phases of the formalin test (Male: Acute & inflammatory ED50s = 0.23 mg/kg; Females: Acute ED50 = 0.24 mg/kg, Chronic ED50 = 0.2mg/kg), without development of tolerance during chronic treatment (11days). JWH133 did not cause cross tolerance for morphine but morphine caused cross-tolerance for JWH-133 antinociception. Coadministration of JWH133 and morphine reduced morphine tolerance. 1:10 fixed dose ratio of JWH-133/Morphine and non-linear Isobolographic analysis were used to examine potential synergy on antinociception. |
| Zhang 2017    | Adult Male Wistar Rats. Walker 256 tumour cell implantation in right hindpaw (cancer pain) | Paw withdrawal latency to radiant heat (Hargreaves test)                 | Morphine, S.C. (10 mg/kg)      | AM1241, I.T. (0.07 ug)                                            | Not Determined                                                                                                               | Not Determined                                                                       | No change in potency                                                                                                                                         | Single doses administered twice daily for 8 days, antinociception tested daily. Drug interaction ascertained from data obtained on days 1-4. Antinociception in both assays was equivalent to morphine alone on days 1-4. AM1241 dose was subtherapeutic and reduced development of morphine tolerance, which was blocked by CB2R antagonist.                                                                                                                                                                                                                                                                                     |
| Zhang 2018    | Male ICR Mice, Naïve.                                                                      | Von Frey Filament and hot-Plate Tests (52 degrees C)                     | Morphine, S.C. (5 mg/kg)       | AM1241, I.P. (0.3, 1, 3 mg/kg)                                    | Not Determined                                                                                                               | Not Determined                                                                       | Potential synergy                                                                                                                                            | AM1241 had no antinociceptive effects when administered alone. The highest dose of AM1241 (3 mg/kg) increased acute morphine antinociception on both von Frey and hotplate assays. Coadministration of AM1241/morphine reduced acute/chronic morphine tolerance and naloxone-precipitated jumping but had no effect on naloxone-precipitated diarrhea and did not alter spontaneous locomotor activity.                                                                                                                                                                                                                           |
| Zhang 2016    | Adult Male Wistar Rats. Walker 256 tumour cell implantation in right hindpaw (cancer pain) | Von Frey filament and hotplate tests (52 degrees C)                      | Morphine, S.C. (10 mg/kg)      | AM1241, I.T. (0.07 ug)                                            | Not Determined                                                                                                               | Not Determined                                                                       | No change in potency                                                                                                                                         | Single doses administered twice daily for 8 days, antinociception tested each day on both assays. Drug interaction ascertained from data obtained on day 1. Antinociception in both assays was equivalent to morphine alone. AM1241 dose was subtherapeutic and reduced development of morphine tolerance.                                                                                                                                                                                                                                                                                                                        |

p.o. = oral administration, s.c. = subcutaneous, t.d. transdermal, i.p. = intraperitoneal, i.t. = intrathecal, MPE = maximum possible effect, ICR = Imprinting Control Region, pmol = picomol, ED = Effective dose, ID = Inhibitory Dose, delta-9-THC = delta-9-tetrahydrocannabinol, PAG = periaqueductal gray matter

Appendix 5. Proportion of participants in observational studies reporting cessation of opioid use (a: top panel), and reduction in opioid use (including those who ceased)(b: bottom panel)

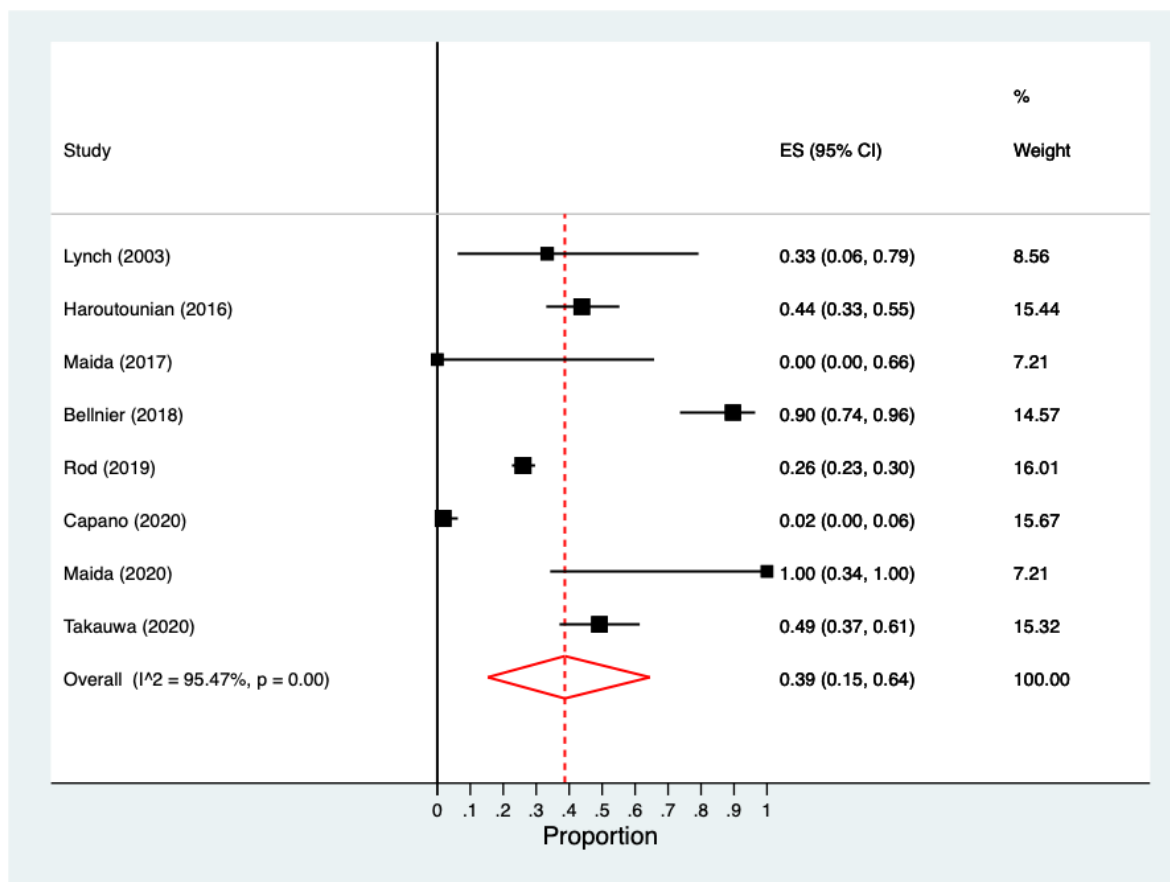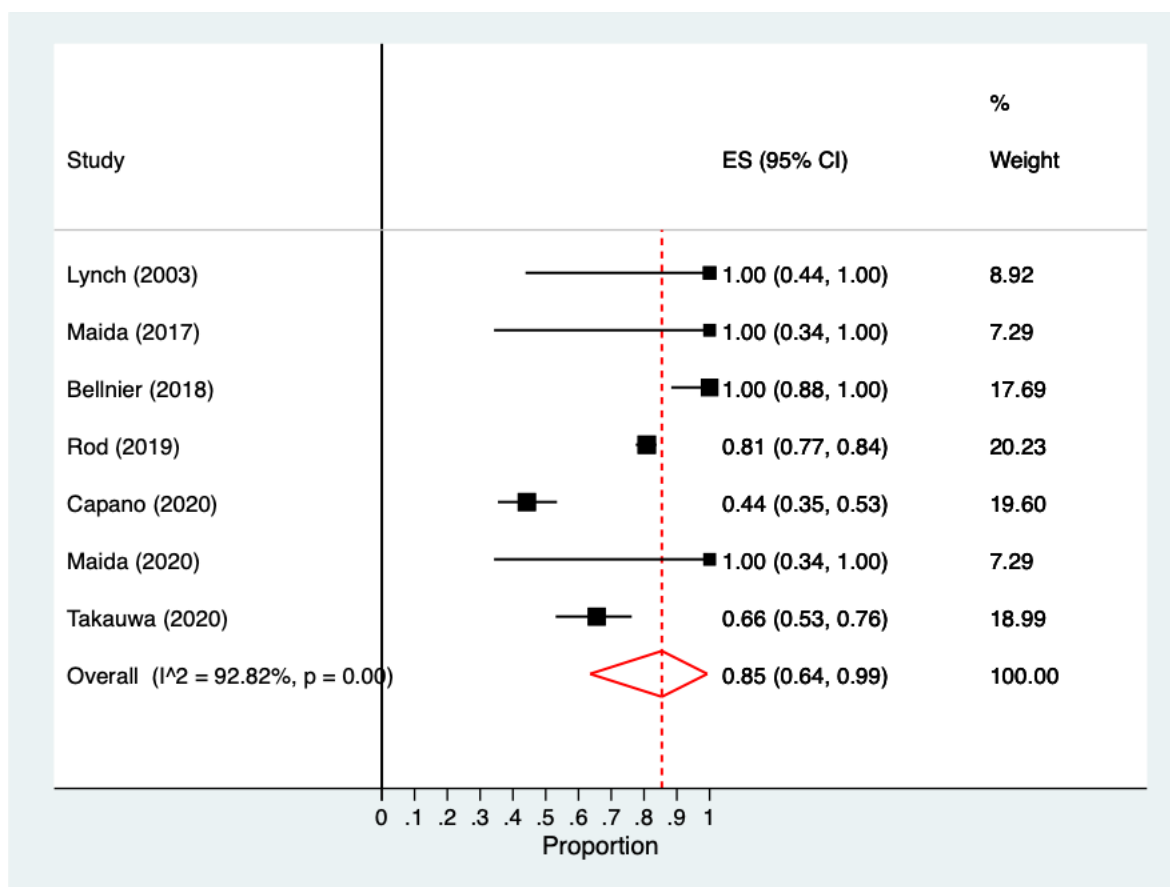



Appendix 6: Registered clinical trials, where results are not yet available (n=15)

| Year | Title                                                                                                                                                                | Location    | Trial status                           | Link                                                                                                                                                        |
|------|----------------------------------------------------------------------------------------------------------------------------------------------------------------------|-------------|----------------------------------------|-------------------------------------------------------------------------------------------------------------------------------------------------------------|
| 2018 | A study that evaluates the effectiveness of oral medicinal cannabis for people with advanced cancer experiencing a range of symptoms                                 | Australia   | Recruiting                             | <a href="https://trialsearch.who.int/Trial2.aspx?TrialID=ACTRN12618001220257">https://trialsearch.who.int/Trial2.aspx?TrialID=ACTRN12618001220257</a>       |
| 2018 | Inhaled Cannabis Versus Immediate -release Oral Opioids for Management of Breakthrough Pain in Cancer Patients                                                       | USA         | Recruiting                             | <a href="https://clinicaltrials.gov/show/NCT03564548">https://clinicaltrials.gov/show/NCT03564548</a>                                                       |
| 2018 | COPE: Cannabinoids to Obviate Pain Experiment After Knee Replacement                                                                                                 | Canada      | Not yet recruiting                     | <a href="https://clinicaltrials.gov/show/NCT03675971">https://clinicaltrials.gov/show/NCT03675971</a>                                                       |
| 2018 | Cannabis Oil for Chronic Non-Cancer Pain Treatment (CONCEPT)                                                                                                         | Canada      | Unknown                                | <a href="https://clinicaltrials.gov/show/NCT03635593">https://clinicaltrials.gov/show/NCT03635593</a>                                                       |
| 2018 | Nabilone Use For Acute Pain in Inflammatory Bowel Disease Patients                                                                                                   | Canada      | Not yet recruiting                     | <a href="https://clinicaltrials.gov/show/NCT03422861">https://clinicaltrials.gov/show/NCT03422861</a>                                                       |
| 2019 | A study that evaluates the effectiveness of oral combined THC/CBD for people with advanced cancer experiencing a range of symptoms                                   | Australia   | Recruiting                             | <a href="https://anzctr.org.au/ACTRN12619000037101.aspx">https://anzctr.org.au/ACTRN12619000037101.aspx</a>                                                 |
| 2019 | Interaction between opioids and cannabinoids in the treatment of fibromyalgia pain                                                                                   | Netherlands | Recruitment may be ongoing or finished | <a href="https://trialsearch.who.int/Trial2.aspx?TrialID=EUCTR2019-001861-33-NL">https://trialsearch.who.int/Trial2.aspx?TrialID=EUCTR2019-001861-33-NL</a> |
| 2019 | Pain Response to Cannabidiol in Opioid-induced Hyperalgesia, Acute Nociceptive Pain and Allodynia By Using a Model Mimicking Acute Pain in Healthy Adults (CANAB II) | Switzerland | Completed (results not yet published)  | <a href="https://clinicaltrials.gov/show/NCT04059978">https://clinicaltrials.gov/show/NCT04059978</a>                                                       |
| 2019 | Cannabidiol, Morphine, Pain.                                                                                                                                         | USA         | Recruiting                             | <a href="https://clinicaltrials.gov/show/NCT04030442">https://clinicaltrials.gov/show/NCT04030442</a>                                                       |
| 2019 | Cannabinoids vs. Placebo on Persistent Post-surgical Pain Following TKA: A Pilot RCT                                                                                 | Canada      | Not yet recruiting                     | <a href="https://clinicaltrials.gov/show/NCT03825965">https://clinicaltrials.gov/show/NCT03825965</a>                                                       |
| 2019 | Efficacy of dronabinol for acute pain management in adults with traumatic injury: Study protocol of a randomized controlled trial                                    | USA         | Terminated insufficient resources      | <a href="https://clinicaltrials.gov/ct2/show/NCT03928015">https://clinicaltrials.gov/ct2/show/NCT03928015</a>                                               |
| 2020 | Do Discounted Vouchers for Medical Cannabis Reduce Opioid Use in Adults With Pain (ReLeaf-V)                                                                         | USA         | Recruiting                             | <a href="https://clinicaltrials.gov/show/NCT04495725">https://clinicaltrials.gov/show/NCT04495725</a>                                                       |
| 2020 | Safety and Effects on Responses to Stress and Pain of Natural Medical Marijuana Product                                                                              | USA         | Not yet recruiting                     | <a href="https://clinicaltrials.gov/ct2/show/NCT04226690">https://clinicaltrials.gov/ct2/show/NCT04226690</a>                                               |
| 2020 | A Study to Assess the Effect of Cannabidiol Oil on Pain After Ureteroscopy for Kidney Stones                                                                         | USA         | Enrolling by invitation                | <a href="https://clinicaltrials.gov/ct2/show/NCT04387617">https://clinicaltrials.gov/ct2/show/NCT04387617</a>                                               |
| 2020 | Prospective Blinded Randomized Controlled Trial Evaluating the Outcomes of Cannabinoid (CBD) Roll-on Topical Stick in Primary Total Knee Arthroplasty                | USA         | Enrolling by invitation                | <a href="https://clinicaltrials.gov/show/NCT04585230">https://clinicaltrials.gov/show/NCT04585230</a>                                                       |
